# Supplementary Information

## The Genetic History of Northern Europe

Alissa Mittnik<sup>1,2</sup>, Chuan-Chao Wang<sup>1</sup>, Saskia Pfrenkle<sup>2</sup>, Mantas Daubaras<sup>3</sup>, Gunita Zarina<sup>4</sup>, Fredrik Hallgren<sup>5</sup>, Raili Allmäe<sup>6</sup>, Valery Khartanovich<sup>7</sup>, Vyacheslav Moiseyev<sup>7</sup>, Anja Furtwängler<sup>2</sup>, Aida Andrades Valtueña<sup>1</sup>, Michal Feldman<sup>1</sup>, Christos Economou<sup>8</sup>, Markku Oinonen<sup>9</sup>, Andrejs Vasks<sup>4</sup>, Mari Tõrv<sup>10</sup>, Oleg Balanovsky<sup>11,12</sup>, David Reich<sup>13,14,15</sup>, Rimantas Jankauskas<sup>16</sup>, Wolfgang Haak<sup>1,17</sup>, Stephan Schiffels<sup>1</sup> and Johannes Krause<sup>1,2</sup>

<sup>1</sup>Max Planck Institute for the Science of Human History, Jena, Germany

<sup>2</sup>Institute for Archaeological Sciences, Archaeo- and Palaeogenetics, University of Tübingen, Tübingen, Germany

<sup>3</sup>Department of Archaeology, Lithuanian Institute of History, Vilnius

<sup>4</sup>Institute of Latvian History, University of Latvia, Riga, Latvia

<sup>5</sup>The Cultural Heritage Foundation, Västerås, Sweden

<sup>6</sup>Archaeological Research Collection, Tallinn University, Tallinn, Estonia

<sup>7</sup>Peter the Great Museum of Anthropology and Ethnography (Kunstkamera) RAS, St. Petersburg, Russia

<sup>8</sup>Archaeological Research Laboratory, Stockholm University, Stockholm, Sweden

<sup>9</sup>Finnish Museum of Natural History - LUOMUS, University of Helsinki, Finland

<sup>10</sup>Independent researcher, Estonia

<sup>11</sup>Research Centre for Medical Genetics, Moscow, Russia

<sup>12</sup>Vavilov Institute for General Genetics, Moscow, Russia

<sup>13</sup>Department of Genetics, Harvard Medical School, Boston, Massachusetts 02115, USA

<sup>14</sup>Broad Institute of Harvard and MIT, Cambridge, Massachusetts 02142, USA

<sup>15</sup>Howard Hughes Medical Institute, Harvard Medical School, Boston, Massachusetts 02115, USA

<sup>16</sup>Department of Anatomy, Histology and Anthropology, Vilnius University, Vilnius, Lithuania

<sup>17</sup>School of Biological Sciences, The University of Adelaide, Adelaide SA-5005, South Australia, Australia

**Supplementary Information Figure S1. Sex determination using the X rate/Y rate method.**

**Supplementary Information Figure S2. PCA analysis on modern West Eurasian populations.**

**Supplementary Information Table S1. Negative results for admixture  $f_3$ (Source A, Source B; Target).**

**Supplementary Information Table S2. Significantly positive results for  $D$ (Ancient Eastern Baltic population, A; X, Mbuti).**

**Supplementary Information Table S3. Significantly positive results for  $D$ (Ancient Scandinavian population, A;X, Mbuti).**

**Supplementary Information Table S4. *qpWave* analysis of eastern Baltic populations showing possible waves of admixture.**

**Supplementary Information Table S5. *qpWave* analysis of Scandinavian populations showing possible waves of admixture.**

**Supplementary Information Table S6. *qpAdm* analysis of admixture proportions in ancient eastern Baltic populations.**

**Supplementary Information Table S7. *qpAdm* analysis of admixture proportions in ancient Scandinavian populations.**

**Supplementary Information Table S8. Significantly positive results for  $D$ (Modern eastern Baltic population, Baltic\_BA;X, Mbuti).**

**Supplementary Information Table S9. Significantly positive results for  $D$ (EHG/SHG, Hunter-Gatherer; MA1/AG3, Mbuti).**

**Supplementary Information Table S10. Significantly positive results for  $D$ (Ancient Eastern Baltic population, A; X, Mbuti) using only transversion sites.**

**Supplementary Information Table S11. Significantly positive results for  $D$ (Ancient Scandinavian population, A;X, Mbuti) using only transversion sites.**

**Supplementary Information Section 1. Archeological context and sample description.**

**Supplementary Information Section 2. Supplementary Methods: Screening of samples.**

**Supplementary Information Section 3. Y chromosomal haplogroup analysis.**

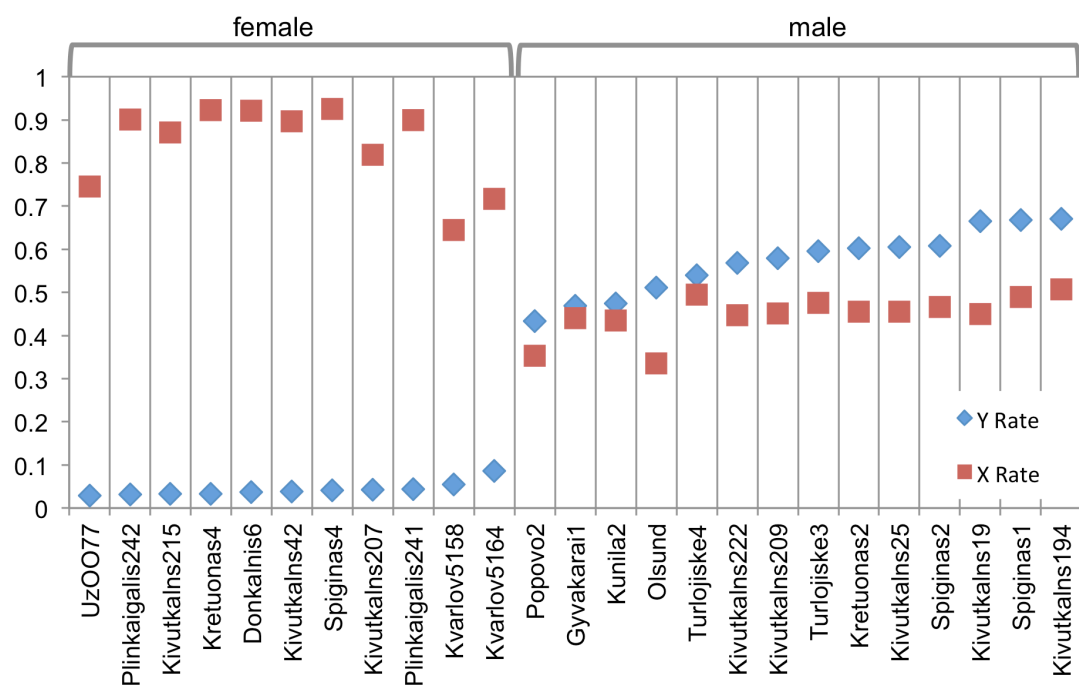

**Supplementary Information Figure S1. Sex determination using the X rate/Y rate method.** The Y rate shows greater usefulness in distinguishing male from female samples.

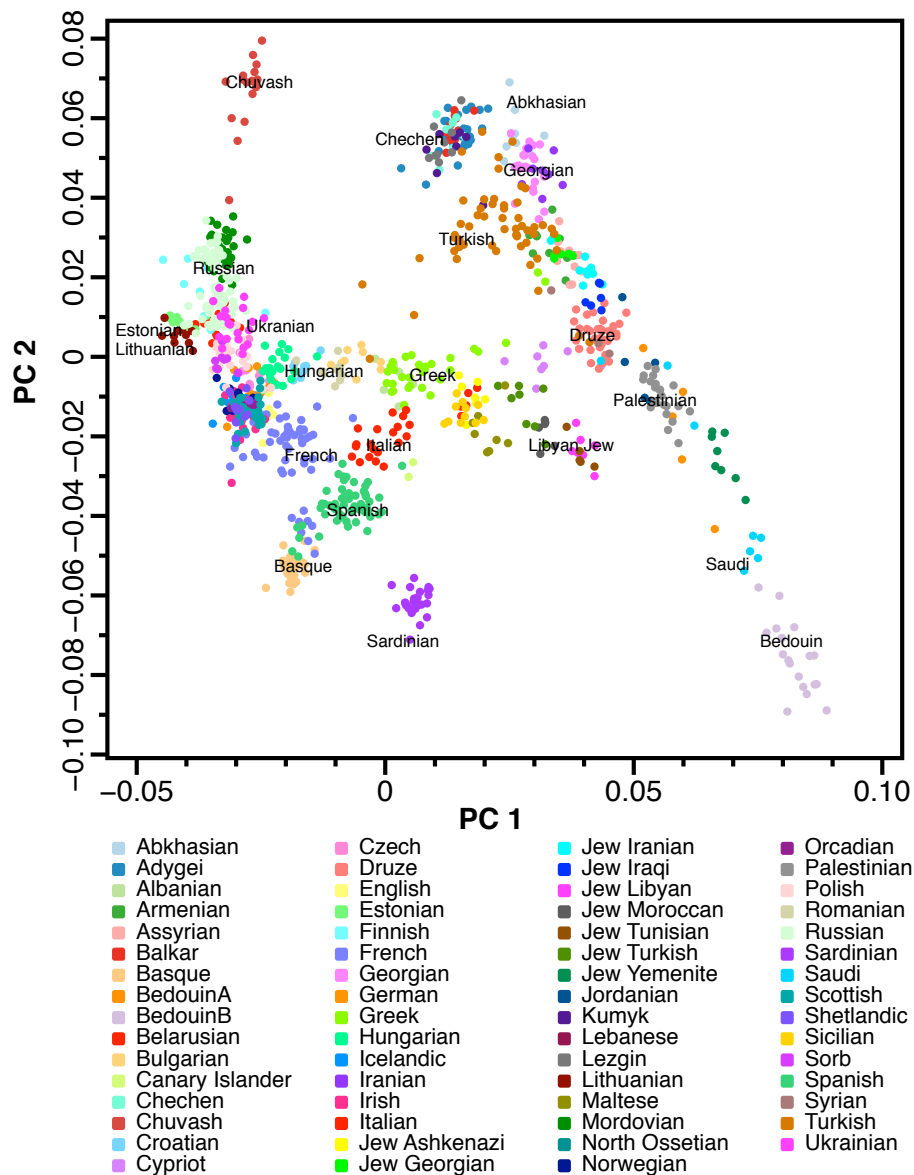

**Supplementary Information Figure S2. PCA analysis on modern West Eurasian populations.** Showing population labels for 1007 modern individuals used to construct the PCA in Fig. 2a.

**Supplementary Information Table S1. Negative results for admixture  $f_3$ (Source A, Source B; Target). All combinations of ancient populations were tested as sources for a Target ancient Scandinavian or eastern Baltic population under study. The twelve most negative hits are shown for tests with more negative results.**

| Target           | Source A      | Source B           | $f_3$ -value | Std. error | Z       |
|------------------|---------------|--------------------|--------------|------------|---------|
| Baltic LNBA      | Anatolia_N    | EHG                | -0.010247    | 0.000922   | -11.118 |
|                  | CHG           | Kunda              | -0.014097    | 0.001634   | -8.626  |
|                  | EHG           | Europe_EN_Starcevo | -0.012102    | 0.001886   | -6.417  |
|                  | Iran_LN       | Kunda              | -0.011527    | 0.00209    | -5.516  |
|                  | Iran_N        | Kunda              | -0.011431    | 0.001751   | -6.529  |
|                  | Iran_HotulIb  | Kunda              | -0.011009    | 0.002983   | -3.69   |
|                  | CHG           | Narva              | -0.010958    | 0.001184   | -9.254  |
|                  | CHG           | SHG                | -0.010766    | 0.001091   | -9.872  |
|                  | Iran_N        | Narva              | -0.010741    | 0.001294   | -8.302  |
|                  | EHG           | Levant_N           | -0.010656    | 0.001129   | -9.44   |
|                  | Iran_HotulIb  | WHG                | -0.010646    | 0.002052   | -5.187  |
| Baltic BA        | Iran_LN       | Narva              | -0.010593    | 0.001437   | -7.371  |
|                  | CHG           | Kunda              | -0.008067    | 0.001639   | -4.921  |
|                  | Iran_LN       | Kunda              | -0.006938    | 0.002022   | -3.43   |
|                  | Iran_HotulIb  | WHG                | -0.006711    | 0.001885   | -3.559  |
|                  | Iran_ChL      | Narva              | -0.006586    | 0.000833   | -7.903  |
|                  | Iran_N        | Narva              | -0.006396    | 0.001167   | -5.481  |
|                  | Iran_LN       | Narva              | -0.006297    | 0.00127    | -4.957  |
|                  | Kunda         | Levant_BA          | -0.00628     | 0.001344   | -4.673  |
|                  | Iran_N        | Kunda              | -0.006278    | 0.00169    | -3.714  |
|                  | Iran_LN       | WHG                | -0.006238    | 0.001368   | -4.56   |
|                  | Iran_ChL      | Kunda              | -0.006139    | 0.001259   | -4.875  |
| MN TRB           | Iran_ChL      | WHG                | -0.006012    | 0.000931   | -6.457  |
|                  | Levant_BA     | Switzerland_HG     | -0.005562    | 0.001325   | -4.198  |
|                  | Levant_N      | Switzerland_HG     | -0.019363    | 0.005397   | -3.588  |
|                  | Anatolia_N    | Switzerland_HG     | -0.013243    | 0.004      | -3.311  |
|                  | Europe_EN_LBK | Switzerland_HG     | -0.012758    | 0.004164   | -3.064  |
| Scandinavia LNBA | Anatolia_N    | WHG                | -0.011853    | 0.003496   | -3.39   |
|                  | Anatolia_N    | EHG                | -0.010921    | 0.000974   | -11.209 |
|                  | Anatolia_ChL  | Switzerland_HG     | -0.013443    | 0.002069   | -6.496  |
|                  | Iran_HotulIb  | WHG                | -0.013133    | 0.002271   | -5.784  |
|                  | Levant_BA     | Switzerland_HG     | -0.012884    | 0.001444   | -8.922  |
|                  | Iran_ChL      | Switzerland_HG     | -0.012674    | 0.001331   | -9.519  |
|                  | Iran_LN       | Switzerland_HG     | -0.012662    | 0.001914   | -6.614  |
|                  | Armenia_EBA   | Switzerland_HG     | -0.012406    | 0.001357   | -9.142  |
|                  | Iran_N        | WHG                | -0.012274    | 0.00132    | -9.296  |
|                  | EHG           | Europe_EN_Starcevo | -0.012095    | 0.002158   | -5.605  |
|                  | Iran_ChL      | WHG                | -0.011965    | 0.001078   | -11.095 |
|                  | CHG           | WHG                | -0.011939    | 0.001237   | -9.652  |
|                  | Levant_N      | Switzerland_HG     | -0.011889    | 0.001487   | -7.994  |

**Supplementary Information Table S2. Significantly positive results for  $D(\text{Ancient Eastern Baltic population}, A; X, \text{Mbuti})$ .**  $A$  is a geographically or chronologically proximate population and  $X$  is every other ancient population. This test shows if a *modern Baltic population* shares significantly more alleles with  $X$  than Baltic\_BA does with  $X$  when  $Z > 3$ . The thirty tests with highest significance are shown.

| Test      | A                  | X                                | D      | Z      |
|-----------|--------------------|----------------------------------|--------|--------|
| Kunda     | WHG                | Baltic_LN                        | 0.0149 | 4.338  |
|           |                    | EHG                              | 0.0173 | 3.887  |
|           |                    | Narva                            | 0.0159 | 3.651  |
|           |                    | SHG                              | 0.0145 | 3.547  |
|           |                    | Steppe_EMBA_Poltavka             | 0.0139 | 3.545  |
|           |                    | Steppe_EMBA_Yamnaya_Kalmykia     | 0.013  | 3.497  |
|           |                    | Baltic_BA                        | 0.0112 | 3.215  |
|           |                    | Iran_ChL                         | 0.0115 | 3.119  |
|           |                    | Steppe_Eneolithic_Samara         | 0.0152 | 3.096  |
|           |                    | Steppe_EMBA_Afnasievo            | 0.0117 | 3.002  |
| Narva     | Kunda              | No significant results           |        |        |
| Narva     | WHG                | EHG                              | 0.0163 | 5.412  |
|           |                    | Steppe_EMBA_Poltavka             | 0.0115 | 4.265  |
|           |                    | Baltic_BA                        | 0.0099 | 4.18   |
|           |                    | Steppe_EMBA_Afnasievo            | 0.0101 | 3.874  |
|           |                    | CordedWare_Baltic                | 0.009  | 3.868  |
|           |                    | Steppe_Eneolithic_Samara         | 0.0114 | 3.597  |
|           |                    | CordedWare_Central               | 0.0085 | 3.588  |
|           |                    | Iran_Hotulilb                    | 0.0178 | 3.582  |
|           |                    | Yamnaya_Samara                   | 0.009  | 3.571  |
|           |                    | Steppe_MLBA_Poltavka_outlier     | 0.0122 | 3.411  |
|           |                    | Steppe_MLBA_Srubnaya             | 0.0078 | 3.381  |
|           |                    | SHG                              | 0.0099 | 3.365  |
|           |                    | Steppe_EMBA_Yamnaya_Kalmykia     | 0.0083 | 3.231  |
|           |                    | Armenia_ChL                      | 0.0079 | 3.172  |
|           |                    | Europe_LNBA_Unetice              | 0.0071 | 3.15   |
| Baltic_LN | CordedWare_Central | No significant results           |        |        |
| Baltic_LN | Yamnaya_Samara     | Europe_EN_Iberia                 | 0.0109 | 5.047  |
|           |                    | Europe_MNChL_Hungary             | 0.013  | 4.808  |
|           |                    | Europe_MNChL_Iberia_Chalcolithic | 0.009  | 4.785  |
|           |                    | Kunda                            | 0.0137 | 4.769  |
|           |                    | Europe_EN_Hungary                | 0.0089 | 4.694  |
|           |                    | Switzerland_HG                   | 0.0125 | 4.467  |
|           |                    | Europe_MNChL_Iberia              | 0.0088 | 4.186  |
|           |                    | Levant_N                         | 0.0087 | 4.055  |
|           |                    | Narva                            | 0.0092 | 3.888  |
|           |                    | Europe_EN_LBK                    | 0.0068 | 3.632  |
|           |                    | Europe_MNChL_Central             | 0.0083 | 3.623  |
|           |                    | WHG                              | 0.0087 | 3.499  |
|           |                    | Europe_EN_Starcevo               | 0.0131 | 3.447  |
|           |                    | EN_TRB                           | 0.0097 | 3.392  |
|           |                    | Europe_MNChL_Remedello           | 0.0088 | 3.301  |
|           |                    | Anatolia_N                       | 0.0058 | 3.175  |
| Baltic_BA | Baltic_LN          | Narva                            | 0.025  | 11.679 |
|           |                    | WHG                              | 0.0249 | 11.18  |
|           |                    | Europe_EN_Hungary                | 0.0174 | 9.431  |
|           |                    | Europe_MNChL_Iberia_Chalcolithic | 0.0153 | 8.359  |
|           |                    | Anatolia_N                       | 0.0148 | 8.172  |
|           |                    | Europe_EN_LBK                    | 0.0149 | 8.141  |
|           |                    | Levant_BA                        | 0.0151 | 7.841  |
|           |                    | Europe_MNChL_Iberia              | 0.016  | 7.831  |
|           |                    | Europe_LNBA_Hungary              | 0.0167 | 7.634  |
|           |                    | Kunda                            | 0.0211 | 7.44   |
|           |                    | SHG                              | 0.0159 | 7.364  |
|           |                    | Switzerland_HG                   | 0.0202 | 7.284  |
|           |                    | Europe_MNChL_Central             | 0.014  | 6.428  |
|           |                    | Europe_LNBA_BellBeaker           | 0.0104 | 6.199  |
|           |                    | EN_TRB                           | 0.0164 | 6.157  |
|           |                    | Levant_N                         | 0.0132 | 6.067  |
|           |                    | Europe_LNBA_Vatya                | 0.0131 | 5.877  |
|           |                    | Europe_LNBA_Central              | 0.0101 | 5.575  |
|           |                    | Europe_EN_Iberia                 | 0.0116 | 5.567  |
|           |                    | Europe_MNChL_Hungary             | 0.0142 | 5.371  |
|           |                    | PWC                              | 0.0132 | 5.339  |
|           |                    | Europe_LNBA_Unetice              | 0.0095 | 5.254  |
|           |                    | MN_TRB                           | 0.0121 | 4.899  |
|           |                    | Anatolia_ChL                     | 0.0125 | 4.749  |
|           |                    | Armenia_ChL                      | 0.0084 | 4.583  |
|           |                    | Steppe_MLBA_Srubnaya             | 0.0077 | 4.533  |
|           |                    | Armenia_EBA                      | 0.0084 | 4.203  |
|           |                    | Natufian                         | 0.0112 | 4.101  |
|           |                    | Europe_MNChL_Remedello           | 0.0102 | 4.063  |
|           |                    | Iran_ChL                         | 0.0064 | 3.444  |
|           |                    | Europe_LNBA_Nordic_LBA           | 0.0152 | 3.437  |
|           |                    | CordedWare_Central               | 0.0062 | 3.406  |
|           |                    | Europe_EN_Starcevo               | 0.012  | 3.26   |
|           |                    | Europe_EN_LBKT                   | 0.0162 | 3.017  |

**Supplementary Information Table S3. Significantly positive results for  $D(\text{Ancient Scandinavian population}, A; X, \text{Mbuti})$ .** A is a geographically or chronologically proximate population and  $X$  is every other ancient population. This test shows if  $\text{Test}$  shares significantly more alleles with  $X$  than A does with  $X$  when  $Z > 3$ .

| Test             | A                               | X                                | D      | Z      |
|------------------|---------------------------------|----------------------------------|--------|--------|
| SHG              | WHG                             | EHG                              | 0.0422 | 12.797 |
|                  |                                 | Steppe_Eneolithic_Samara         | 0.0329 | 9.756  |
|                  |                                 | MA1                              | 0.0347 | 8.319  |
|                  |                                 | Steppe_EMBA_Poltavka             | 0.0216 | 7.377  |
|                  |                                 | Steppe_EMBA_Yamnaya_Samara       | 0.0201 | 7.347  |
|                  |                                 | Steppe_EMBA_Yamnaya_Kalmykia     | 0.0198 | 7.133  |
|                  |                                 | PWC                              | 0.0235 | 6.328  |
|                  |                                 | Steppe_EMBA_Srubnaya             | 0.0269 | 6.22   |
|                  |                                 | Steppe_EMBA_Afanasievo           | 0.0176 | 5.953  |
|                  |                                 | Clovis                           | 0.0224 | 5.844  |
|                  |                                 | Kennewick                        | 0.0211 | 5.106  |
|                  |                                 | CordedWare_Baltic                | 0.0118 | 4.326  |
|                  |                                 | Europe_LNBA_CordedWare_Central   | 0.0107 | 4.164  |
|                  |                                 | Steppe_EMBA_Russia_EBA           | 0.0204 | 4.081  |
|                  |                                 | Steppe_IA                        | 0.0148 | 4.029  |
|                  |                                 | Iran_N                           | 0.0135 | 4.002  |
|                  |                                 | AG2                              | 0.0239 | 3.85   |
|                  |                                 | Armenia_ChL                      | 0.0097 | 3.643  |
|                  |                                 | Iran_LN                          | 0.0133 | 3.54   |
|                  |                                 | Iran_HotulIb                     | 0.0179 | 3.327  |
|                  |                                 | Steppe_MLBA_Srubnaya             | 0.0084 | 3.323  |
| PWC              | SHG                             | No significant results           |        |        |
| EN_TRB           | Europe_MNChL_Central            | No significant results           |        |        |
| MN_TRB           | EN_TRB                          | No significant results           |        |        |
| MN_TRB           | Europe_MNChL_Central            | PWC                              | 0.0221 | 4.627  |
| Scandinavia LNBA | Baltic_LN                       | Europe_EN_LBK                    | 0.0093 | 4.458  |
|                  |                                 | Anatolia_N                       | 0.0088 | 4.329  |
|                  |                                 | Europe_EN_Iberia                 | 0.0099 | 4.017  |
|                  |                                 | Europe_EN_Hungary                | 0.0081 | 3.866  |
|                  |                                 | Europe_MNChL_Iberia              | 0.0087 | 3.65   |
|                  |                                 | Europe_MNChL_Remedello           | 0.0097 | 3.227  |
|                  |                                 | Europe_MNChL_Iberia_Chalcolithic | 0.0068 | 3.183  |
| Scandinavia LNBA | Europe LNBA Corded Ware Central | No significant results           |        |        |
| Olsund           | Baltic_LN                       | Levant_BA                        | 0.0183 | 5.073  |
|                  |                                 | Anatolia_N                       | 0.0131 | 4.024  |
|                  |                                 | Levant_N                         | 0.0156 | 3.913  |
|                  |                                 | Europe_EN_LBK                    | 0.0128 | 3.81   |
|                  |                                 | Armenia_EBA                      | 0.0127 | 3.63   |
|                  |                                 | Anatolia_ChL                     | 0.0164 | 3.398  |
|                  |                                 | Europe_MNChL_Iberia              | 0.0118 | 3.106  |
|                  |                                 | Europe_MNChL_Iberia_Chalcolithic | 0.0101 | 3.011  |
|                  |                                 | Europe_EN_Hungary                | 0.0103 | 3.005  |
| Olsund           | Scandinavia LNBA                | Levant_BA                        | 0.0106 | 3.082  |

**Supplementary Information Table S4. *qpWave* analysis of eastern Baltic populations showing possible waves of admixture. Tests that are not rejected ( $p > 0.05$ ) are marked in red.**

| Test                      | Reference A        | Reference B        | Rank 0 p-value | Rank 1 p-value | 1 source     | 2 sources    |
|---------------------------|--------------------|--------------------|----------------|----------------|--------------|--------------|
| Kunda                     | WHG                |                    | 1.79E-01       |                | not rejected |              |
| Kunda                     | WHG                | SHG                | 2.73E-95       | 7.58E-01       | rejected     | not rejected |
| Kunda                     | WHG                | EHG                | 6.94E-204      | 8.18E-01       | rejected     | not rejected |
| Narva                     | Kunda              |                    | 1.16E-01       |                | not rejected |              |
| Narva                     | WHG                |                    | 8.55E-15       |                | rejected     |              |
| Narva                     | WHG                | SHG                | 1.19E-97       | 4.54E-01       | rejected     | not rejected |
| Narva                     | WHG                | EHG                | 1.05E-03       | 43.4E-01       | rejected     | not rejected |
| Narva                     | Kunda              | SHG                | 7.21E-46       | 4.55E-01       | rejected     | not rejected |
| Narva                     | Kunda              | EHG                | 5.11E-174      | 3.61E-01       | rejected     | not rejected |
| Narva                     | Kunda              | WHG                | 1.41E-09       | 5.54E-01       | rejected     | not rejected |
| NarvaEast (Kretuonas)     | Kunda              |                    | 8.17E-04       |                | rejected     |              |
| NarvaEast (Kretuonas)     | Kunda              | EHG                | 2.69E-138      | 1.22E-01       | rejected     | not rejected |
| NarvaEast (Kretuonas)     | Kunda              | WHG                | 1.19E-14       | 4.33E-01       | rejected     | not rejected |
| NarvaEast (Kretuonas)     | Kunda              | SHG                | 7.01E-31       | 1.41E-01       | rejected     | not rejected |
| NarvaWest                 | Kunda              |                    | 7.27E-01       |                | not rejected |              |
| NarvaWest                 | Kunda              | WHG                | 2.68E-02       | 6.99E-01       | rejected     | not rejected |
| NarvaWest                 | Kunda              | SHG                | 3.03E-45       | 7.65E-01       | rejected     | not rejected |
| NarvaWest                 | Kunda              | EHG                | 9.09E-163      | 6.57E-01       | rejected     | not rejected |
| Baltic_LN                 | CordedWare_Central |                    | 1.17E-01       |                | not rejected |              |
| Baltic_LN                 | Steppe_EMBA        |                    | 1.59E-13       |                | rejected     |              |
| Baltic_LN_Sope            | CordedWare_Central |                    | 9.74E-02       |                | not rejected |              |
| Baltic_LN_Sope            | Steppe_EMBA        |                    | 3.35E-07       |                | rejected     |              |
| Baltic_LN_Sope            | Narva              |                    | 2.65E-72       |                | rejected     |              |
| Baltic_LN_Plinkaigalis241 | CordedWare_Central |                    | 4.63E-01       |                | not rejected |              |
| Baltic_LN_Plinkaigalis241 | Steppe_EMBA        |                    | 4.70E-03       |                | rejected     |              |
| Baltic_LN_Plinkaigalis241 | Narva              |                    | 3.96E-61       |                | rejected     |              |
| Baltic_LN_Plinkaigalis242 | CordedWare_Central |                    | 6.62E-04       |                | rejected     |              |
| Baltic_LN_Plinkaigalis242 | Steppe_EMBA        |                    | 1.87E-01       |                | not rejected |              |
| Baltic_LN_Plinkaigalis242 | Narva              |                    | 1.48E-131      |                | rejected     |              |
| Baltic_LN_Spiginas2       | CordedWare_Central |                    | 8.08E-07       |                | rejected     |              |
| Baltic_LN_Spiginas2       | Steppe_EMBA        |                    | 4.68E-16       |                | rejected     |              |
| Baltic_LN_Spiginas2       | Narva              |                    | 8.44E-68       |                | rejected     |              |
| Baltic_LN_Spiginas2       | CordedWare_Central | Narva              | 1.38E-242      | 1.80E-01       | rejected     | not rejected |
| Baltic_LN_Kunila          | CordedWare_Central |                    | 9.67E-01       |                | not rejected |              |
| Baltic_LN_Kunila          | Steppe_EMBA        |                    | 8.73E-04       |                | rejected     |              |
| Baltic_LN_Kunila          | Narva              |                    | 1.63E-78       |                | rejected     |              |
| Baltic_LN_Gyvakarai       | CordedWare_Central |                    | 4.88E-03       |                | rejected     |              |
| Baltic_LN_Gyvakarai       | Steppe_EMBA        |                    | 4.06E-01       |                | not rejected |              |
| Baltic_LN_Gyvakarai       | Narva              |                    | 1.49E-146      |                | rejected     |              |
| CordedWare_Central        | Baltic_LN          | MNChL_Central      | 3.18E-21       | 1.34E-01       | rejected     | not rejected |
| Baltic_BA                 | Baltic_LN          |                    | 1.96E-11       |                | rejected     |              |
| Baltic_BA                 | Baltic_LN          | Narva              | 1.18E-255      | 1.14E-02       | rejected     | rejected     |
| Baltic_BA                 | Baltic_LN          | CordedWare_Central | 1.63E-13       | 2.03E-02       | rejected     | rejected     |
| Lithuanian                | Baltic_BA          |                    | 1.26E-03       |                | rejected     |              |
| Estonian                  | Baltic_BA          |                    | 3.97E-11       |                | rejected     |              |



**Supplementary Information Table S5. *qpWave* analysis of Scandinavian populations showing possible waves of admixture.** Tests that are not rejected ( $p > 0.05$ ) are marked in red.

| Test             | Reference A        | Reference B   | Rank 0 p-value | Rank 1 p-value | 1 source     | 2 sources    |
|------------------|--------------------|---------------|----------------|----------------|--------------|--------------|
| SHG              | WHG                |               | 1.33E-98       |                | rejected     |              |
| SHG              | EHG                |               | 2.83E-77       |                | rejected     |              |
| SHG              | Kunda              |               | 3.42E-25       |                | rejected     |              |
| SHG              | Kunda              | EHG           | 9.36E-109      | 6.59E-01       | rejected     | not rejected |
| SHG              | WHG                | EHG           | 2.48E-219      | 5.53E-01       | rejected     | not rejected |
| PWC              | SHG                |               | 6.31E-07       |                | rejected     |              |
| PWC              | Kunda              |               | 4.56E-24       |                | rejected     |              |
| PWC              | Narva              |               | 7.87E-36       |                | rejected     |              |
| PWC              | Kunda              | EN_TRB        | 1.95E-37       | 1.10E-03       | rejected     | rejected     |
| PWC              | Kunda              | MN_TRB        | 5.10E-58       | 4.20E-04       | rejected     | rejected     |
| PWC              | Kunda              | MNCHL_Central | 6.59E-78       | 3.40E-05       | rejected     | rejected     |
| PWC              | Narva              | EN_TRB        | 6.22E-59       | 2.29E-03       | rejected     | rejected     |
| PWC              | Narva              | MN_TRB        | 1.56E-86       | 1.25E-04       | rejected     | rejected     |
| PWC              | Narva              | MNCHL_Central | 1.31E-126      | 3.24E-04       | rejected     | rejected     |
| PWC              | SHG                | EN_TRB        | 9.92E-31       | 8.68E-02       | rejected     | not rejected |
| PWC              | SHG                | MN_TRB        | 5.71E-43       | 4.41E-02       | rejected     | rejected     |
| PWC              | SHG                | MNCHL_Central | 1.38E-66       | 4.44E-02       | rejected     | rejected     |
| EN TRB           | MNCHL_Central      |               | 2.60E-01       |                | not rejected |              |
| EN TRB           | Iberia_MN          |               | 5.00E-01       |                | not rejected |              |
| EN TRB           | Iberia_ChL         |               | 5.40E-01       |                | not rejected |              |
| EN TRB           | MNCHL_Central      | Narva         | 3.67E-83       | 2.15E-01       | rejected     | not rejected |
| EN TRB           | MNCHL_Central      | Kunda         | 1.49E-50       | 2.56E-01       | rejected     | not rejected |
| EN TRB           | MNCHL_Central      | PWC           | 3.89E-12       | 1.93E-01       | rejected     | not rejected |
| EN TRB           | MNCHL_Central      | WHG           | 2.07E-123      | 2.14E-01       | rejected     | not rejected |
| EN TRB           | MNCHL_Central      | SHG           | 1.41E-55       | 2.51E-01       | rejected     | not rejected |
| MN TRB           | MNCHL_Central      |               | 7.71E-01       |                | not rejected |              |
| MN TRB           | EN TRB             |               | 8.58E-01       |                | not rejected |              |
| MN TRB           | EN_TRB             | Narva         | 8.52E-74       | 8.39E-01       | rejected     | not rejected |
| MN TRB           | EN_TRB             | PWC           | 4.77E-09       | 7.87E-01       | rejected     | not rejected |
| MN TRB           | EN_TRB             | SHG           | 8.20E-41       | 8.28E-01       | rejected     | not rejected |
| MN TRB           | MNCHL_Central      | Narva         | 1.03E-126      | 7.33E-01       | rejected     | not rejected |
| MN TRB           | MNCHL_Central      | PWC           | 8.51E-20       | 8.05E-01       | rejected     | not rejected |
| Scandinavia LNBA | CordedWare_Central |               | 4.11E-04       |                | rejected     |              |
| Scandinavia LNBA | Baltic_LN          |               | 4.54E-04       |                | rejected     |              |
| Scandinavia LNBA | CordedWare_Central | MN_TRB        | 2.13E-10       | 3.54E-01       | rejected     | not rejected |
| Scandinavia LNBA | Baltic_LN          | MN_TRB        | 9.50E-14       | 6.97E-01       | rejected     | not rejected |
| Scandinavia LNBA | CordedWare_Central | PWC           | 9.91E-36       | 2.61E-03       | rejected     | rejected     |
| Scandinavia LNBA | Baltic_LN          | PWC           | 3.91E-31       | 6.11E-03       | rejected     | rejected     |
| Olsund           | Scandinavia LNBA   |               | 2.68E-03       |                | rejected     |              |
| Olsund           | Baltic_LN          |               | 6.98E-03       |                | rejected     |              |
| Olsund           | Baltic_LN          | Narva         | 3.07E-224      | 4.25E-03       | rejected     | rejected     |
| Olsund           | Baltic_LN          | SHG           | 4.50E-87       | 9.01E-03       | rejected     | rejected     |
| Olsund           | Scandinavia LNBA   | SHG           | 1.91E-74       | 4.61E-03       | rejected     | rejected     |
| Olsund           | Baltic_LN          | PWC           | 3.83E-32       | 9.27E-03       | rejected     | rejected     |
| Olsund           | Scandinavia LNBA   | PWC           | 1.40E-26       | 8.85E-03       | rejected     | rejected     |
| Olsund           | Baltic_LN          | MN_TRB        | 4.39E-11       | 4.71E-02       | rejected     | rejected     |
| Olsund           | Scandinavia LNBA   | MN_TRB        | 3.60E-06       | 2.40E-02       | rejected     | rejected     |

**Supplementary Information Table S6. *qpAdm* analysis of admixture proportions in ancient eastern Baltic populations.**

| Test                  | Source             |       | Admixture coefficient |        | Std. error |       | p-value  |
|-----------------------|--------------------|-------|-----------------------|--------|------------|-------|----------|
|                       |                    |       | A                     | B      | A          | B     |          |
| Kunda                 | WHG                | SHG   | 84.54%                | 15.46% | 5.20%      | 5.20% | 7.58E-01 |
| Kunda                 | WHG                | EHG   | 91.78%                | 8.22%  | 2.60%      | 2.60% | 8.18E-01 |
| Narva                 | WHG                | SHG   | 69.68%                | 30.32% | 3.10%      | 3.10% | 4.54E-01 |
| Narva                 | WHG                | EHG   | 85.51%                | 14.49% | 1.50%      | 1.50% | 4.34E-01 |
| Narva                 | Kunda              | SHG   | 82.77%                | 17.23% | 5.60%      | 5.60% | 4.55E-01 |
| Narva                 | Kunda              | EHG   | 92.71%                | 7.29%  | 2.60%      | 2.60% | 3.61E-01 |
| Narva                 | Kunda              | WHG   | infeasible            |        |            |       |          |
| NarvaEast (Kretuonas) | Kunda              | EHG   | 86.61%                | 13.39% | 3.00%      | 3.00% | 1.22E-01 |
| NarvaEast (Kretuonas) | Kunda              | WHG   | infeasible            |        |            |       |          |
| NarvaEast (Kretuonas) | Kunda              | SHG   | 67.43%                | 32.57% | 6.70%      | 6.70% | 1.41E-01 |
| NarvaWest             | Kunda              | WHG   | infeasible            |        |            |       |          |
| NarvaWest             | Kunda              | SHG   | 93.50%                | 6.50%  | 6.10%      | 6.10% | 7.65E-01 |
| NarvaWest             | Kunda              | EHG   | 97.37%                | 2.63%  | 2.80%      | 2.80% | 6.46E-01 |
| Baltic_LN_Spiginas2   | CordedWare_Central | Narva | 77.85%                | 22.15% | 3.60%      | 3.60% | 1.53E-01 |

**Supplementary Information Table S7. *qpAdm* analysis of admixture proportions in ancient Scandinavian populations.**

| Test             | Source             |        | Admixture coefficient |        | Std. error |        | p-value  |
|------------------|--------------------|--------|-----------------------|--------|------------|--------|----------|
|                  |                    |        | A                     | B      | A          | B      |          |
| SHG              | Kunda              | EHG    | 62.31%                | 37.63% | 2.60%      | 2.60%  | 6.59E-01 |
| SHG              | WHG                | EHG    | 57.53%                | 42.47% | 1.80%      | 1.80%  | 5.53E-01 |
| PWC              | SHG                | EN_TRB | 91.11%                | 8.89%  | 3.30%      | 3.30%  | 8.68E-02 |
| EN_TRB           | MNChL_Central      | Narva  | 95.93%                | 4.07%  | 9.90%      | 9.90%  | 2.15E-01 |
| EN_TRB           | MNChL_Central      | Kunda  | 96.65%                | 3.35%  | 3.40%      | 3.40%  | 2.56E-01 |
| EN_TRB           | MNChL_Central      | WHG    | 98.45%                | 1.55%  | 4.60%      | 4.60%  | 2.15E-01 |
| EN_TRB           | MNChL_Central      | SHG    | 96.25%                | 3.75%  | 6.20%      | 6.20%  | 2.51E-01 |
| MN_TRB           | EN_TRB             | Narva  | 96.57%                | 3.53%  | 5.10%      | 5.10%  | 8.39E-01 |
| MN_TRB           | EN_TRB             | PWC    | 93.51%                | 6.49%  | 11.00%     | 11.00% | 7.87E-01 |
| MN_TRB           | EN_TRB             | SHG    | 97.32%                | 2.68%  | 7.50%      | 7.50%  | 8.28E-01 |
| MN_TRB           | MNChL_Central      | Narva  | 97.71%                | 2.29%  | 3.30%      | 3.30%  | 7.33E-01 |
| MN_TRB           | MNChL_Central      | PWC    | 96.34%                | 3.66%  | 7.00%      | 7.00%  | 8.05E-01 |
| Scandinavia LNBA | CordedWare_Central | MN_TRB | 70.99%                | 29.01% | 7.20%      | 7.20%  | 4.36E-01 |
| Scandinavia LNBA | Baltic_LN          | MN_TRB | 67.59%                | 32.41% | 6.80%      | 6.80%  | 7.17E-01 |

**Supplementary Information Table S8. Significantly positive results for *D*(Modern eastern Baltic population, Baltic\_BA;X, Mbuti).** We tested all modern populations for *X*. This test shows if *Test* shares significantly more alleles with *X* than A does with *X* when  $Z > 3$ . The 40 most significant tests are shown for each.

| Test       | A         | X                  | D      | Z     |
|------------|-----------|--------------------|--------|-------|
| Lithuanian | Baltic_BA | Kurd               | 0.0094 | 5.938 |
|            |           | Druze              | 0.0073 | 5.936 |
|            |           | BedouinA           | 0.007  | 5.821 |
|            |           | Karaim             | 0.0075 | 5.604 |
|            |           | Libyan             | 0.0075 | 5.587 |
|            |           | Sicilian           | 0.0071 | 5.586 |
|            |           | Sardinian          | 0.0073 | 5.578 |
|            |           | Lebanese           | 0.0071 | 5.537 |
|            |           | Palestinian        | 0.0067 | 5.526 |
|            |           | BedouinB           | 0.0075 | 5.514 |
|            |           | Egyptian           | 0.0065 | 5.501 |
|            |           | Assyrian_WGA       | 0.0075 | 5.446 |
|            |           | Jew_Yemenite       | 0.0074 | 5.401 |
|            |           | Jew_Moroccan       | 0.0072 | 5.394 |
|            |           | Lebanese_Muslim    | 0.0069 | 5.388 |
|            |           | Cypriot            | 0.0074 | 5.387 |
|            |           | Jordanian          | 0.0071 | 5.355 |
|            |           | Jew_Libyan         | 0.007  | 5.306 |
|            |           | Jew_Ethiopian      | 0.0061 | 5.234 |
|            |           | Jew_Tunisian       | 0.0071 | 5.222 |
|            |           | Moroccan           | 0.006  | 5.157 |
|            |           | Saudi              | 0.007  | 5.145 |
|            |           | Lebanese_Christian | 0.0069 | 5.126 |
|            |           | Armenian           | 0.0068 | 5.096 |
|            |           | Jew_Iranian        | 0.007  | 5.05  |
|            |           | Turkish            | 0.0062 | 5.049 |
|            |           | Jew_Turkish        | 0.0069 | 5.045 |
|            |           | Ain_Touta          | 0.0072 | 5.038 |
|            |           | Assyrian           | 0.0067 | 5.031 |
|            |           | Ezid               | 0.0066 | 4.99  |
|            |           | Georgian           | 0.0065 | 4.94  |
|            |           | Armenian           | 0.0073 | 4.876 |
|            |           | Maltese            | 0.0065 | 4.874 |
|            |           | Jew_Georgian       | 0.0066 | 4.87  |
|            |           | Tunisian           | 0.0059 | 4.838 |
|            |           | Yemeni             | 0.0063 | 4.807 |
|            |           | Jew_Iraqi          | 0.0066 | 4.741 |
|            |           | Spanish            | 0.0058 | 4.711 |
|            |           | Turkish_Balikesir  | 0.0066 | 4.654 |
|            |           | Greek              | 0.006  | 4.619 |
| Estonian   | Baltic_BA | Tu                 | 0.0082 | 5.146 |
|            |           | Naxi               | 0.0078 | 4.84  |
|            |           | Yi                 | 0.0078 |       |
|            |           | Mongola            | 0.0077 | 4.722 |
|            |           | Kinh               | 0.0073 | 4.619 |
|            |           | Han                | 0.007  | 4.473 |
|            |           | Borneo             | 0.007  | 4.426 |
|            |           | Nanai              | 0.0072 | 4.315 |
|            |           | Dungan             | 0.0066 | 4.294 |
|            |           | Negidal            | 0.0078 | 4.283 |
|            |           | Evenk_Transbaikal  | 0.0071 | 4.281 |
|            |           | Japanese           | 0.0068 | 4.255 |
|            |           | Ulchi              | 0.0068 | 4.242 |
|            |           | Assyrian           | 0.006  | 4.22  |
|            |           | Hezhen             | 0.0069 | 4.201 |
|            |           | Kalmyk             | 0.0064 | 4.199 |
|            |           | Nganasan           | 0.0069 | 4.191 |
|            |           | Cambodian          | 0.0066 | 4.179 |
|            |           | Xibo               | 0.0066 | 4.17  |
|            |           | Semende            | 0.0068 | 4.154 |
|            |           | Dai                | 0.0066 | 4.126 |
|            |           | Tujia              | 0.0066 | 4.124 |
|            |           | Lahu               | 0.0066 | 4.098 |
|            |           | Nivh               | 0.0068 | 4.061 |
|            |           | Korean             | 0.0068 | 4.059 |
|            |           | Miao               | 0.0067 | 4.043 |
|            |           | Mongol             | 0.0059 | 4.03  |
|            |           | Khakass_Kachins    | 0.0062 | 3.995 |
|            |           | Druze              | 0.0051 | 3.987 |
|            |           | She                | 0.0065 | 3.963 |
|            |           | Itelmen            | 0.007  | 3.962 |
|            |           | Thai               | 0.0062 | 3.948 |
|            |           | Oroqen             | 0.0065 | 3.927 |
|            |           | Kurd_WGA           | 0.0064 | 3.926 |
|            |           | Jew_Ethiopian      | 0.0048 | 3.921 |
|            |           | Ami                | 0.0066 | 3.888 |
|            |           | BedouinA           | 0.0048 | 3.883 |
|            |           | Buryat             | 0.0059 | 3.822 |
|            |           | Palestinian        | 0.0047 | 3.814 |

**Supplementary Information Table S9. Significantly positive results for  $D(\text{EHG}/\text{SHG}, \text{Hunter-Gatherer}; \text{MA1}/\text{AG3}, \text{Mbuti})$ .** This test shows if EHG or SHG shares significantly more alleles with MA1 or AG3 (signifying ANE ancestry) than another ancient *HG* group does with MA1 or AG3 when  $Z > 3$ .

| Test | HG    | MA1/AG3       | D       | Z       |
|------|-------|---------------|---------|---------|
| EHG  | CHG   | AfontovaGora3 | 0.1388  | 23.541  |
|      | WHG   | AfontovaGora3 | 0.1154  | 22.441  |
|      | Narva | AfontovaGora3 | 0.0987  | 19.766  |
|      | CHG   | MA1           | 0.0975  | 17.873  |
|      | PWC   | AfontovaGora3 | 0.093   | 15.232  |
|      | Kunda | AfontovaGora3 | 0.0971  | 13.911  |
|      | WHG   | MA1           | 0.0654  | 13.752  |
|      | SHG   | AfontovaGora3 | 0.0698  | 13.375  |
|      | Narva | MA1           | 0.0587  | 12.515  |
|      | PWC   | MA1           | 0.0573  | 10.587  |
|      | Kunda | MA1           | 0.0601  | 10.117  |
|      | SHG   | MA1           | 0.0343  | 7.612   |
|      | CHG   | AfontovaGora3 | 0.0754  | 13.964  |
|      | CHG   | MA1           | 0.065   | 12.64   |
| SHG  | WHG   | AfontovaGora3 | 0.0507  | 10.834  |
|      | WHG   | MA1           | 0.0347  | 8.319   |
|      | Narva | AfontovaGora3 | 0.0307  | 7.388   |
|      | Narva | MA1           | 0.0265  | 7.186   |
|      | PWC   | MA1           | 0.0257  | 5.173   |
|      | Kunda | MA1           | 0.0269  | 5.062   |
|      | Kunda | AfontovaGora3 | 0.0291  | 4.536   |
|      | PWC   | AfontovaGora3 | 0.0269  | 4.535   |
|      | EHG   | MA1           | -0.0343 | -7.612  |
|      | EHG   | AfontovaGora3 | -0.0698 | -13.375 |

**Supplementary Information Table S10. Significantly positive results for  $D$ (Ancient Eastern Baltic population,  $A$ ;  $X$ , Mbuti) using only transversion sites.  $A$  is a geographically or chronologically proximate population and  $X$  is every other ancient population. This test shows if a modern Baltic population shares significantly more alleles with  $X$  than Baltic\_BA does with  $X$  when  $Z > 3$ . The thirty tests with highest significance are shown.**

| Test      | A                  | X                                | D      | Z     |
|-----------|--------------------|----------------------------------|--------|-------|
| Kunda     | WHG                | SHG                              | 0.0249 | 3.92  |
|           |                    | CordedWare_Baltic                | 0.021  | 3.689 |
|           |                    | BA_Baltic                        | 0.0198 | 3.618 |
|           |                    | Narva                            | 0.0226 | 3.503 |
|           |                    | Iran_ChL                         | 0.0203 | 3.267 |
|           |                    | Europe_LNBA_Unetice              | 0.0176 | 3.231 |
|           |                    | Steppe_MLBA_Poltavka_outlier     | 0.0314 | 3.21  |
|           |                    | Europe_LNBA_CordedWare_Germany   | 0.0172 | 3.206 |
|           |                    | Steppe_EMBA_Poltavka             | 0.0203 | 3.198 |
|           |                    | Steppe_IA                        | 0.0259 | 3.134 |
|           |                    | Europe_LNBA_Central              | 0.0191 | 3.113 |
|           |                    | SHG                              | 0.0249 | 3.92  |
| Narva     | Kunda              | No significant results           |        |       |
| Narva     | WHG                | EHG                              | 0.017  | 3.84  |
|           |                    | Steppe_EMBA_Poltavka             | 0.0142 | 3.679 |
|           |                    | BA_Baltic                        | 0.012  | 3.448 |
|           |                    | Steppe_EMBA_Yamnaya_Kalmykia     | 0.0126 | 3.391 |
|           |                    | Malta_AfontovaGora3              | 0.0266 | 3.216 |
|           |                    | SHG                              | 0.0132 | 3.214 |
|           |                    | Steppe_EMBA_Afanasievo           | 0.0125 | 3.186 |
|           |                    | Europe_LNBA_Unetice              | 0.0112 | 3.124 |
| Baltic_LN | CordedWare_Central | No significant results           |        |       |
| Baltic_LN | Yamnaya_Samara     | Europe_MNChL_Iberia_Chalcolithic | 0.014  | 4.78  |
|           |                    | Europe_MNChL_Iberia              | 0.0147 | 4.547 |
|           |                    | Kunda                            | 0.0206 | 4.488 |
|           |                    | Europe_EN_Iberia                 | 0.0149 | 4.335 |
|           |                    | Villabruna_Villabruna            | 0.0176 | 4.175 |
|           |                    | Europe_EN_LBK                    | 0.0102 | 3.723 |
|           |                    | Narva                            | 0.0126 | 3.66  |
|           |                    | Europe_MNChL_Central             | 0.0134 | 3.634 |
|           |                    | Switzerland_HG                   | 0.0136 | 3.286 |
|           |                    | Europe_EN_Hungary                | 0.0097 | 3.278 |
|           |                    | Europe_MNChL_Remedello           | 0.0149 | 3.274 |
|           |                    | WHG                              | 0.011  | 3.188 |
|           |                    | Anatolia_N                       | 0.0083 | 3.079 |
|           |                    | Villabruna_Villabruna            | 0.032  | 7.603 |
| Baltic_BA | Baltic_LN          | Narva                            | 0.0233 | 7.194 |
|           |                    | WHG                              | 0.0225 | 7.015 |
|           |                    | Europe_EN_Hungary                | 0.016  | 5.52  |
|           |                    | Villabruna_Ranchot88             | 0.0278 | 5.439 |
|           |                    | Anatolia_N                       | 0.0139 | 5.103 |
|           |                    | Kunda                            | 0.022  | 4.865 |
|           |                    | Switzerland_HG                   | 0.0194 | 4.826 |
|           |                    | Europe_EN_LBK                    | 0.0131 | 4.794 |
|           |                    | SHG                              | 0.0157 | 4.694 |
|           |                    | Europe_MNChL_Hungary             | 0.0188 | 4.658 |
|           |                    | Europe_MNChL_Iberia              | 0.014  | 4.409 |
|           |                    | Europe_MNChL_Iberia_Chalcolithic | 0.0127 | 4.353 |
|           |                    | EN_TRB                           | 0.0224 | 4.326 |
|           |                    | Levant_BA                        | 0.0133 | 3.964 |
|           |                    | Villabruna_Chaudardes1           | 0.0432 | 3.874 |
|           |                    | Europe_LNBA_Hungary              | 0.0131 | 3.701 |
|           |                    | EIMiron_EIMiron                  | 0.0158 | 3.546 |
|           |                    | Levant_N                         | 0.0128 | 3.451 |
|           |                    | Europe_LNBA_Vatya                | 0.0126 | 3.363 |
|           |                    | PWC                              | 0.0124 | 3.335 |
|           |                    | Armenia_ChL                      | 0.0098 | 3.255 |
|           |                    | Anatolia_ChL                     | 0.0146 | 3.169 |
|           |                    | Dolni_Vestonice16                | 0.0128 | 3.007 |

**Supplementary Information Table S11. Significantly positive results for  $D(\text{Ancient Scandinavian population}, A; X, \text{Mbuti})$  using only transversion sites.**  $A$  is a geographically or chronologically proximate population and  $X$  is every other ancient population. This test shows if  $\text{Test}$  shares significantly more alleles with  $X$  than  $A$  does with  $X$  when  $Z > 3$ .

| Test             | A                    | X                            | D      | Z     |
|------------------|----------------------|------------------------------|--------|-------|
| SHG              | WHG                  | EHG                          | 0.0405 | 8.707 |
|                  |                      | Malta_AfontovaGora3          | 0.0594 | 7.28  |
|                  |                      | MA1                          | 0.0334 | 5.808 |
|                  |                      | Steppe_Eneolithic_Samara     | 0.0313 | 5.787 |
|                  |                      | PWC                          | 0.0255 | 4.994 |
|                  |                      | Steppe_EMBA_Yamnaya_Kalmykia | 0.0181 | 4.508 |
|                  |                      | Steppe_EMBA_Poltavka         | 0.0181 | 4.402 |
|                  |                      | Steppe_EMBA_Yamnaya_Samara   | 0.0165 | 4.326 |
|                  |                      | Steppe_EMBA_Afanasievo       | 0.014  | 3.285 |
| PWC              | SHG                  | No significant results       |        |       |
| EN_TRB           | Europe_MNChL_Central | No significant results       |        |       |
| MN_TRB           | EN_TRB               | Steppe_MLBA_Andronovo        | 0.0353 | 3.753 |
|                  |                      | Iberia_BA                    | 0.055  | 3.055 |
| MN_TRB           | Europe_MNChL_Central | PWC                          | 0.0356 | 4.52  |
|                  |                      | WHG                          | 0.025  | 4.018 |
|                  |                      | EHG                          | 0.0231 | 3.247 |
|                  |                      | Anatolia_N                   | 0.0113 | 3.678 |
| Scandinavia LNBA | Baltic_LN            | Europe_EN_Iberia             | 0.0142 | 3.539 |
|                  |                      | Europe_EN_LBK                | 0.0111 | 3.531 |
|                  |                      | Europe_EN_Hungary            | 0.0107 | 3.181 |
|                  |                      | Europe_MNChL_Iberia          | 0.0122 | 3.152 |
|                  |                      | Europe_EN_Iberia             | 0.0127 | 3.256 |
| Olsund           | Baltic_LN            | Europe_MNChL_Iberia          | 0.0204 | 3.374 |
|                  |                      | Armenia_EBA                  | 0.0192 | 3.336 |
|                  |                      | Levant_BA                    | 0.0195 | 3.285 |
| Olsund           | Scandinavia LNBA     | No significant results       |        |       |

## Supplementary Information 1

### Archeological context and sample description

This section provides archeological context for the 24 individuals for whom we report new genome-wide data, as well as the additional 81 human remains that were screened for this study. We also give a general overview of the prehistory of the Eastern Baltic and Scandinavian region as understood through archeology. Uncalibrated radiocarbon dates are in BP, calibrated radiocarbon dates are given at 94.5% confidence interval (calBCE), contextual archeological dating is given in BCE. The radiocarbon dates are not corrected for potential reservoir effects.

A tabular overview of information from all samples and their sequencing results is given in Supplementary Data Table 1.

### The Eastern Baltic Region

Despite the similarities in the material culture and the smallness of the region, chronologies of the prehistory in the Baltic States varies, and to understand the context properly these have to be introduced first (Supplementary Information Section 1 Table S1).

**Supplementary Information Section 1 Table S1. Chronology of prehistoric cultures in the eastern Baltic region.**

|                                    | <b>Estonia</b><br>(after Kriiska 2009; Lang 2007a, b) |                                                           | <b>Latvia</b><br>(after Loze 2000; Zagorska 2001; Lang 2007b) |                                           | <b>Lithuania</b><br>(after Antanaitis-Jacobs & Girinikas 2002; Antanaitis-Jacobs et al. 2012; Lang 2007b) |                              |
|------------------------------------|-------------------------------------------------------|-----------------------------------------------------------|---------------------------------------------------------------|-------------------------------------------|-----------------------------------------------------------------------------------------------------------|------------------------------|
| Mesolithic<br>(9000–4300/<br>4100) | Early Mesolithic<br>(9000–7000)                       | Kunda Culture<br>(9000–4900)                              | Early Mesolithic                                              | Pulli Culture<br>(9000–6500)              | Early Mesolithic<br>(9000–6000)                                                                           | Kunda Culture<br>(9000–5300) |
|                                    | Late Mesolithic<br>(7000–4200)                        |                                                           | Middle Mesolithic                                             | Kunda Culture<br>(6500–5400)              |                                                                                                           |                              |
|                                    |                                                       | Narva Culture<br>(4900–4200)                              | Late Mesolithic                                               | Narva Culture<br>(5400–4100)              | Late Mesolithic<br>(6000–4550/4300)                                                                       |                              |
| Neolithic<br>(4200–1800)           | Early Neolithic<br>(4200–3600)                        | Typical Combed Ware Culture<br>(4200–3600)                | Early Neolithic                                               |                                           | Early Neolithic<br>(4550/4300–3600/3400)                                                                  | Narva Culture<br>(5300–1750) |
|                                    | Late Neolithic<br>(3600–1800)                         | Late Combed Ware (3600–1800) /<br>Corded Ware (2900–1800) | Middle Neolithic<br>(4100–2900)                               | Combed Ware and East Baltic Ware Cultures | Middle Neolithic<br>(3600/3400–2400/2300)                                                                 |                              |
|                                    |                                                       |                                                           | Late Neolithic<br>(2900–1800/1500)                            | Corded Ware and Abora I Ware Cultures     | Late Neolithic<br>(2400/2300–1800/1500)                                                                   |                              |
|                                    |                                                       |                                                           |                                                               |                                           |                                                                                                           |                              |
| Bronze Age<br>(1800–500)           | Early Bronze Age (1800 – 1300)                        |                                                           | Early Bronze Age (1800/1500–1100)                             |                                           | Early Bronze Age (1800/1500–1300/1100)                                                                    |                              |
|                                    | Middle Bronze Age (1300–900)                          |                                                           | Late Bronze Age (1100–500)                                    |                                           | Late Bronze Age (1300/1100–500)                                                                           |                              |
|                                    | Late Bronze Age (900–500)                             |                                                           |                                                               |                                           |                                                                                                           |                              |

All dates given in BCE.



Despite the differences in the dates these chronologies highlight the following archaeologically visible turning points in the prehistory of the Eastern Baltic: (1) initial colonization of the region; (2) transition of subsistence relying on terrestrial mammals to the sea resources; (3) beginning of pottery production by hunter-gatherers; (4) influx of exotic resources; (5) introduction of farming and crop cultivation; and (6) introduction of first metal objects and metallurgy.

Initial colonization of the Eastern Baltic region occurred after the retreat of the ice sheets in the first half of the 9<sup>th</sup> millennium BCE and following centuries. The pioneering settlers arrived from south and thus the first settlements are known from the territory of Southern-Lithuania and Latvia (already 11 000 BCE; Zagorska 1999; Kriiska & Tvaauri 2002), whereas the northern shores of Estonia were inhabited a bit later. During ca. 9000–8500 BCE natural sources of flint, manufacturing techniques and analogous forms of bone and antler artefacts as well as similarities of lithic technologies point to the existence of extensive networks in the European Boreal zone (Kriiska 2015). From ca. 8000 BCE a transition from Paleolithic cultures to the Mesolithic Kunda Culture is seen. The name-giving site Kunda Lammasmägi was discovered already in 1870s during the marl mining (Grewingk 1881; Indreko 1948). The abundant bone material together with small items from mainly quartz hint on a variety of activities on the site (Indreko 1948; Jaanits et al. 1982). The dominant species was elk (Lõugas 1996), while fish and seal bones appeared to be rare, indicating a subsistence dominated by terrestrial mammals (Indreko 1948; Lõugas 1996). In general, Kunda Culture, is characterized by inland camp sites on the shores of larger rivers and lakes, the main prey came from forests – being elk and beaver (Kriiska & Tvaauri 2002) and the flint technology aiming at using the all the available source material to produce flakes to make small items was prevalent (see e.g. Kriiska et al. 2011). At the second half of the Kunda period, during the 7<sup>th</sup> millennium BCE the habitation spread to coast and further to the islands of the Baltic Sea (Kriiska 2009). During the Littorina Sea phase in the Baltic Sea basin hunting of marine mammals became important. From the beginning of the period there are no burial sites known; the earliest human remains – from the end of Kunda period – are known from the Zvejnieki cemetery in Northern Latvia (Zagorska 2006; Mannerman et al. 2007).

The beginning of pottery production at the region dates back to the 6<sup>th</sup> millennium BCE being a cultural loan and an invention of hunter-gatherers. This period is named after the sites discovered in Narva area at the North-Eastern Estonia. As the successor of the Kunda Culture, the Narva Culture emerged around ca. 5500 BCE in the eastern inland Baltic region and spread north-, south and coastward in the following millennium, occupying the same region as the Kunda Culture (Jaanits 1965b). In Estonia Narva Culture is distinguished only in the Late Mesolithic phase, whereas both in Latvia and Lithuania it continues to the Neolithic (Supplementary Information Section 1 Table S1). Despite this technological innovation of pottery production there were no marked changes in the life ways or usages of raw materials of hunter-gatherers in the Eastern Baltic region. Continuity with the Mesolithic tradition is seen

in production and use of bone and antler artefacts. Also continued is the subsistence strategy of foraging, and numerous finds show evidence for reliance on fishing (Loze 1993, Rimantienė 1994). In Estonia the majority of the sites are located on the coast (Kriiska & Tvaauri 2002) and seal-hunting grew in importance, with presumably specialized seasonal sites for this purpose found on Estonian islands (Kriiska & Lõugas 1999). In the Middle Neolithic first sparse evidence is found in Narva sites for domesticated plants and animals but foraging remains the dominant economy (Rimantienė 1994). Assemblages of the Narva Culture persist in its southern occupational area until the Late Neolithic (Antanaitis-Jacobs & Girininkas 2002).

The chronologically and geographically overlapping Comb Ware Culture of pottery producing hunter-gatherers to the north exhibited geographically extensive and intensive spread of foreign materials and artefacts, especially during Early Neolithic. On the territory of present-day Estonia flint, amber and metatuff from foreign sources were widely used. For example, flint is most likely from the upper reaches of the Volga River, but also from South Lithuania or Belarus. The origin of amber is difficult to detect, because the material and form are similar over an extensive area, most likely the amber came from Western Latvia and Western Lithuania. Metatuff used during the Stone Age on the territory of present day Estonia most likely came from the Onega region in Karelia in present day Russia; most numerous artefact made of metatuff is Russian-Karelian type of wood chopping tool (Kriiska 2015 and references therein).

The process of Neolithization is different in the Eastern Baltic region from what is known in Central and Southern Europe, where the 'Neolithic package' is mostly defined by simultaneous emergence of pottery production, crop cultivation and herding of domesticated animals, sedentary life way, and monumental architecture. In the Eastern Baltic, it has been a long tradition that the pottery production solely defines the beginning of Neolithic, whereas the life ways of the people do not change that markedly. Recently, however, Kerkko Nordqvist and Aivar Kriiska have listed the characteristics of Neolithization in the region as the following (Nordqvist & Kriiska 2015, and references therein):

- Pottery – great local variability of ceramics, which exhibit further a mixture of local traditions, domestic innovations, and external influences. Many new lines of development, like cultivation and rock art, appear roughly simultaneously with the adoption of pottery, even if these phenomena become more pronounced or visible only much later, especially around and after 4000 calBCE.
- From the 5th millennium calBCE onwards the material culture and the variety of raw materials become increasingly versatile. The broadening selection of mineral raw materials is especially striking. The working of stone materials and, consequently, the properties of artefacts start to change as well.
- The large-scale appearance of imported raw materials and artefacts is another novelty: carboniferous and cretaceous flint, particular slates and metatuffites as well as amber – and objects made of them. These materials and artefacts were transported

in fairly large quantities and over distances of several hundreds, in some cases well over a thousand kilometres. Some artefact groups like wood-chopping tools of Russian-Karelian type or Baltic amber ornaments even indicate some sort of mass- or specialised production from the 4<sup>th</sup> millennium calBCE onwards. The new exotic raw materials include also metal. The use of native copper started soon after 4000 calBCE in the Lake Onega region, from where it was also exported to Finland.

- Further, the formation or re-aligning of these contact or social networks and the changes they reflect or cause in the society are essential to the whole development discussed here. As mentioned above, the old ‘borders’, which derive from the Mesolithic remained visible after the adoption of pottery in the research area. However, the strong Neolithic impulse around 4000 calBCE, which can, for example, be mirrored against the distribution of Typical Comb Ware, transcends these borders and shows a significant change in the prevailing networks. After several centuries this situation was changing again (Nordqvist & Kriiska 2015, 543).

Recent aDNA studies have resolved the long-lasting debate between the migrationists and diffusionists about the origins of Corded Ware/Battle Axe Culture in the Eastern Baltic (see e.g. Lõugas et al. 2007). It has been shown that these populations migrated to the region from the area of Yamnaya culture at the Russian steppe (Haak et al. 2015, Allentoft et al. 2015). This took place during the first centuries of the 3rd millennium BCE. This migration also brought about the onset of food production as a regular form of subsistence in all the present Baltic States (see e.g. Antanaitis-Jacobs & Girininkas 2002, 19; Tõrv 2016). However, the new way of life – agriculture – did not mean an end to the hunter-gatherer populations. These existed parallel in the Eastern Baltic region for a while (see e.g. Lõugas et al. 2007; Tõrv 2016). Differently from the hunter-gatherer sites the occupation layers of Corded Ware sites were rather thin (Kriiska & Tvaari 2002; Lõugas et al. 2007). Moreover, Corded Ware people preferred to settle farther from the shores of water-bodies, neither were their habitation sites known from the coastal areas (Lõugas et al. 2007). The culture is mostly defined by the abundant grave finds – inhumations in flexed limbs and a specific set of grave goods comprising of battle axes and pottery –, and stray finds of boat shaped axes.

The beginning of Bronze Age in the Eastern Baltic is defined by the occurrence of the first bronze items, changes in the material culture in general, and the spread of bronze work. The earliest indications on the local bronze work in the region derive from Latvia and Lithuania around 2000 BCE (Lang 2007b). The earliest bronze items show that Eastern Baltic tribes had contacts with different populations reaching from Scandinavia (Lang & Kriiska 2007) to Russia (Lang 2007a). Early Bronze Age has been seen as a transition period from Late Neolithic to the Late Bronze Age (Lang 2007a). Despite the fact that many areas inhabited tensely during the Late Neolithic were abandoned and areas more appropriate for land cultivation were adopted during the Early Bronze Age, many previously known sites still remained settled; also stone

tools still played a major role in the everyday life. Differently from Estonia EBA cemeteries are known both from Latvia (earth graves and barrows) and Lithuania (barrows) (Lang 2007b).

The classical characteristics of Eastern Baltic Bronze Age become visible during the LBA. Some of the most significant antiquities from the LBA are the fortified settlements that are known from all three Baltic States (e.g. Iru, Asva, Kivutkalns, Vinakalns, Narkunai, Nevieriškes; Lang 2007b). Several families resided in these sites, it has been estimated that the typical community ranged between 30 to 50 members (Lang 2007a, 223). In addition to the EBA barrows known from Latvia and Lithuania there are also stone graves with above-ground constructions known from Estonia. These circular stone-cist graves are the most studied objects from the given period (Lang 2007a). Also boat graves and earth graves are known from this period. For the first time in the Eastern Baltic prehistory we have marks on ancient field-systems (clearance cairn field, block-shaped fields: Baltic and Celtic fields) that are well studied in Estonia (Lang 2007a, b). These remarkable changes in material culture signify changes in the social structure and culture of the society. By the end of the period Eastern Baltic populations relied on economy fully focused on agriculture. These farming societies were characterized by stratified social structure developed ownership rights, rich material culture, and specific religious beliefs (Lang 2007a).

#### Kõnnu, Estonia

Kõnnu is located on the present island of Saaremaa at the Kõnnu village (Pihtla parish). During its habitation it was a separate island in Litorina Sea a couple of kilometres south-east from the larger island of Saaremaa (Jaanits 1979, 366; Kriiska 2007; Poska & Saarse 2002; Saarse et al. 2009a, b); according to analyses of the faunal material it has been argued to be a camp for seal hunting (Lõugas 1996, 105). The settlement and burial site was discovered during gravel mining in the spring of 1977. The archaeological investigations lead by Lembit Jaanits took place in 1977 and 1978 (as the gravel mining continued documentation of the finds were carried out in 1979–1986). Most of the find material consisted of small quartz artefacts; amongst flint artefacts only scrapers were distinguished, also remarkable number of tooth pendants and various types of ceramics were found (Jaanits 1979, 363–367).

The site is from Late Mesolithic and Early Neolithic, and is attributed to Kunda, Narva and Combed Ware Culture (Jaanits 1979, 367; Tõrv 2016, 128). The skeletal remains of four individuals were found in graves I, II, and III, whereas grave II contained the remains of two individuals (Jaanits 1979, 365–367; AI 4951). In addition to these single human bones were gathered from non-grave archaeological contexts (Tõrv 2016, 100).

The biological sex and age at death estimations, and radiocarbon dates taken from Tõrv (2016).

- Kõnnu I, juvenile, (KIA-49481, 6297±29 BP, 5320–5210 calBCE)

- Kõnnu IIa (prev. II), older child, (UBA-25997, 6222±33BP, 5310–5060 calBCE).
- Kõnnu IIb (prev. IIa), younger child. No direct radiocarbon dating.

#### Veibri quadruple burial, Estonia

The burial site is situated in south-eastern Estonia on a flood plain on the northern shore of the Suur Emajõgi River in the village of Veibri. The site was first discovered in 1997 and identified as a Corded Ware Culture and Medieval settlement site (Kriiska 1997); in 2003 bones exposed above the ground were detected. During the excavations (lead by Kristiina Johanson, Mari Lõhmus(Tõrv) and Tõnno Jonuks) of human skeletal remains a quadruple grave was unearthed. The archaeothanatological analyses revealed that this is a multiple burial (Tõrv 2016), thus the deceased were buried simultaneously (Allmäe 2011, Tõrv 2016); no grave goods were found despite Narva-type pottery sherd close to skeleton III (Kriiska et al. 2007).

The quadruple grave (TÜ 1424) is dated to the Late Mesolithic/Early Neolithic (Kriiska et al. 2007, Tõrv 2016), biological sex and age at death estimation from Allmäe (2011):

- Veibri I/I child 12, (Ua-43124, 5580±39, 4490–4340 calBCE); (UBA-2735, 55791±43, 4770–4530 calBCE).
- Veibri I/II female 25–32 yrs, (Hela-1331, 6090±45, 5210–4850 calBCE).
- Veibri I/III child 5 yrs, (KIA-48842, 5841±29, 4790–4610 calBCE).
- Veibri I/IV child 4 yrs, (KIA-48843, 5940±22, 4900–4720 calBCE).

#### Kivisaare, Estonia

Kivisaare settlement and burial site is located in the southern part of Estonia in Lalsi village, approximately 1.5 km from Põltsamaa River and 6 km from present shore of Lake Võrtsjärv (Kriiska et al. 2007). Here, the human skeletal remains have been found occasionally since 1882 during gravel mining. The around 30 individuals found there makes it one of the largest burial grounds in the present-day Estonia (Tõrv 2016). Several archaeological excavations on site have been conducted by different archaeologists since 1910 confirming human activity from Mesolithic to Bronze Age (Ottow 1911; Bolz 1914; Tallgren 1922; Indreko 1935; Jaanits et al. 1982, 100; Kriiska et al. 2003, 2004, 2007; Kriiska & Lõhmus 2005; Tõrv & Meadows 2015).

Kivisaare burials III, IIIa and IV were unearthed in 1960s (Jaanits 1965; AI 4379), IIIa burial was distinguished as a separate individual and labelled by Tõrv during osteological analysis (2016, 148). The burials under study are attributed to Narva Culture and Combed Ware Culture (Kriiska *et al.* 2007); Narva type pottery was found near Kivisaare IV burial (Kriiska et al. 2003). Radiocarbon dates of burials from Kriiska *et al.* (2007) and Tõrv (2016), biological sex and age at death estimations from Tõrv (2016).

- Kivisaare III, male? adult (UBA-25993, 5796±37BP, 4730–4540 calBCE)

- Kivisaare IIIa, adult. No direct radiocarbon dating.
- Kivisaare IV, older child (Poz-10840, 5450±40BP, 4370–4230 calBC; KIA-50905, 5705±35BP, 4680–4450 calBCE)

#### Naakamäe, Estonia

Naakamäe is a settlement and burial site in south-western part of Saaremaa island, and is attributed to the Typical and Late Combed Ware Culture (Jaanits 1965b; Jaanits et al. 1982, 77, 83, 85). The settlement site was excavated by Lembit Jaanits during 1958–1962; one burial was found at the edge of settlement area. The body was buried on its back with upper limbs slightly abducted at the shoulder, the latter being projected upwards, arms medially rotated, and forearms flexed at the elbow and pronated, the hands being slightly flexed on the wrist and rested in front of the abdomen; the lower extremities were both extended from the hip and knee (Tõrv 2016, 218). Beneath the skull ochre was found, and a bone awl (AI 4022) was placed next to left body side (Jaanits et al. 1982, 83).

The biological sex and age at death estimation from Karin Mark personal archive (TLU AI, F18), and radiocarbon date from Lõugas et al. 1996.

- Naakamäe I, female adult (Ua-4822; 4125±85, 2890–2480 calBCE)

#### Kõljala, Estonia

Kõljala is a burial site in southern part of Saaremaa island. Three burials were unearthed at Kõljala by Richard Hausmann in 1901 (Hausmann 1904; AI K35). Tooth pendants and slate ring ornaments made of metatuff were found with one skeleton. Based on the latter find the graves were dated to the second half of the 3<sup>rd</sup> millennium (Jaanits et al. 1982, 99–100), and attributed to the Combed Ware Culture (Tõrv 2016, 127).

The biological sex and age at death estimations, and radiocarbon dates after Tõrv (2016):

- Kõljala I, male? adult, (UBA-27363; 5180±44 BP, 4230–3810 calBCE)
- Kõljala III, male? adult, (UBA-25996; 4914±32 BP, 3770–3640 calBCE)

#### Tamula, Estonia

Tamula I settlement and burial site is located in southeastern Estonia on the north-eastern shore of Lake Tamula on a shallow cape Roosisaare, where Võhandu River joins the lake. The water level in Lake Tamula was lower during Stone Age than today therefore the cultural layer has been grown on the peat and sandmixed peat. Later the water level arose and the site was covered by lake sediments (Jaanits et al. 1982, 78).

Tamula I settlement and burial site was discovered in 1938, and has been archaeologically investigated during several decades: by Richard Indreko (1942–1943, AI 3932, burials I–III), by Harri Moora (1946, AI 3960, burials IV–VII) and by

Lembit Jaanits (1955–1956, 1961, 1968, 1988–1989; AI 4118, burials VIII–XXV). The settlement and burial site is attributed to Combed Ware and Corded Ware Culture (Jaanits et al. 1982, 78–83). Tamula is outstanding of its amber artefacts, 191 finds have been recorded there (Ots 2006, 42), and of bone artefacts, including tooth pendants (Jaanits *et al.* 1982, 78–82).

The skeletal remains of eight individuals were included to the study. The biological sex and age death estimations are given after Allmäe (2006); burial descriptions after lohmus (2005), Ots (2006), and Tõrv (2016) the radiocarbon dates from Lõugas *et al.* (1996), Kriiska et al. (2007), Mannermaa (2008), and Tõrv (2016).

- Tamula I, female 25–35 yrs, (Poz-15645 4680±40BP, 3630–3360 calBCE), buried on back, arms flexed from the elbow, with lower limbs flexed from the hip and the knee; grave goods present.
- Tamula III, male 25–35 yrs, (Poz-10826 4940±40BP, 3800–3640 calBCE), buried on back, arms and forearms flexed in front of the body and lower limbs flexed from the hip and knee, grave goods present.
- Tamula VI
- Tamula VII, child 8 yrs, (Hela-1335 5760±45BP, 4720–4500 calBCE), buried on back with both upper and lower extremities in extension; large bird bones and a stone; abundant grave goods present.
- Tamula VIII, female 18–25 yrs, (Hela-1336 5370±45BP, 4335–4055BC), buried on back with both upper and lower limbs in extension; wooden pole and branches; abundant grave goods present.
- Tamula IX male? 25-35 yrs.
- Tamula X, female 18–21 yrs, (Ua-4828 5310±85, 4330–3970 calBCE; UBA-27362 4902±52BP, 3890–3530 calBCE), buried on back, with both upper and lower limbs in extension; wooden branches; grave goods present.
- Tamula XI male? 18-25 yrs.
- Tamula XII child 2 yrs +-8 m.
- Tamula XIII child 2-3 yrs.
- Tamula XV, child ~1,5 yrs, buried on back, due to poor preservation the initial body position cannot be reconstructed entirely; grave goods present. No direct radiocarbon date.
- Tamula XVII, female 35–45 yrs, buried on back, with both upper and lower limbs in extension; grave goods present. No direct radiocarbon date.
- Tamula XVIII, female 25–35 yrs, buried on back, with upper limbs extended, lower limbs slightly flexed at knee; no grave goods (UBA-27359; 4696±39BP, 3640–3360 calBCE)

- Tamula XIX male 20–30 yrs.
- Tamula XX, male 25–35 yrs, buried on back, with both upper and lower limbs in extension; wooden branches; no grave goods. No direct radiocarbon date.
- Tamula XXI male 25–35 yrs.
- Tamula XXII, male? 25–35 yrs, (Ua-43123 4830±39BP 3700–3520 calBCE), buried on back with lower limbs hyper-flexed from the knee, placed behind the thighs; grave padded and covered with bark; no grave goods.
- Tamula XXIII male? adult.
- Tamula XXIV child, 2 yrs +-8 m.
- Tamula XXV adolescent.

#### Ardu, Estonia

Ardu cemetery is situated in Northern Estonia in the village of Ardu, in the area of the upper reaches of the Pirita River, 100 meters from the river, on a gravel hill rising above the surrounding river plain (Kriiska *et al.* 2007, Jaanits *et al.* 1982, 104). The site was discovered during gravel mining. Two burials – Ardu I burial (AI 2745) in 1931 and Ardu II burial (AI 3499) in 1936 – were uncovered, both individuals buried in flexed position lying on left lateral side: (Indreko 1931, Saadre 1936). According to grave goods, for example Karlova-type battle-axe, bone adzes, flint adze, flint knives, bone awls, bone buttons, Corded Ware shreds etc., the burials are attributed to the Corded Ware Culture (Jaanits *et al.* 1982, 104–109, 116).

The biological sex and age at death estimations from Karin Mark personal archive (TLU AI, F18); radiocarbon date of Ardu II skeleton (Poz-10824, 4110±40BP 2860–2580 calBCE 2880–2500 calBCE) from Kriiska *et al.* (2007) and Lõugas *et al.* (2007).

- Ardu I, male adult. No direct radiocarbon dating.

#### Sope, Estonia

Sope burial site is situated at Soonurme village in North-Eastern Estonia, 4 km east of Purtse and 2 km south of Jabara village, on the lands of Metsavälja farmstead, on a small sandy knoll on the bank of the Sope Stream (Jaanits *et al.* 1982, 102).

Human skeletal remains and boat-shaped axes have been found since 1880s at Sope. The first proper archaeological excavations at Sope were conducted by Harri Moora (1926), who uncovered strongly flexed female skeleton (Sope I; AI 2607). In 1933 Richard Indreko uncovered second female skeleton (Sope II; AI 3175) with legs flexed at knees, lying on her right body side, right hand beneath her head and left hand lying in front of the the body (Indreko 1933). Both graves contained grave goods: shell of freshwater pearl mussels, bone awls, ceramic vessel, and are attributed to the Corded Ware Culture (Jaanits *et al.* 1982, 102–109, 116; Kriiska *et al.* 2007).



The biological sex and age at death are given after Karin Mark personal archive (TLU AI, F18); radiocarbon dates of from Kriiska *et al.* (2007), Lõugas *et al.* (2007) and Rasmussen *et al.* (2015).

- Sope I, female adult, (UBA-29064; 3969±32, 2575–2349 calBCE).
- Sope II female adult, (Poz-10827; 4090±35BP, 2870–2490 calBCE)

### Kunila, Estonia

Kunila burial site is situated in Central Estonia, 4 km south-west of Puurmani on the western side of a small drumlin on Jaaniantso Hill. The burial site was discovered in 1938, when stone axe and loose human bones were found during gravel mining. During the archaeological excavations in 1948 skeletal remains of two individuals were uncovered (Jaanits 1948; AI 3723). Kunila burials had grave goods: in connection to Kunila I a stone adze and a battle-axe were found; in connection to Kunila II burial an adze of white flint and a grinding stone were obtained. The burials are attributed to Corded Ware Culture (Jaanits *et al.* 1982, 106–109).

The biological sex and age at death are given after Karin Mark personal archive (TLU AI, F18); radiocarbon date from Kriiska *et al.* (2007) and Lõugas *et al.* (2007).

- Kunila I, male adult. No direct radiocarbon date.
- Kunila II, male adult (Poz-10825; 3960±40BP, 2580–2340 calBCE)

### Valma, Estonia

Valma is located in Central Estonia on the north-western shore of Lake Võrtsjärv, at the village Valma. The site was discovered in 1948, archaeological excavations lead by Lembit Jaanits were conducted in 1949, 1950, and 1953–1955. Although the majority of the settlement area was studied no other constructions than c. 10 hearths were found (Jaanits 1955, 188). These allowed concluding that three to five contemporaneous dwellings must have been part of the settlement (Jaanits 1965, 16). Also, six hearths with stone packing were found on the upper horizon of the cultural layer; these could either belong to the Typical Combed Ware or the Corded Ware Culture (Jaanits 1965, 16) or even to the Late Iron Age. The majority of the find material is Typical Combed Ware sherds (Jaanits 1955, 188; Jaanits 1959, 66–68, Таблица III, IV, V; Jaanits 1965, 19 Abb. 8), but shards of Late Combed Ware and Corded Ware were also present. Also small stone tools from local flint were found (Jaanits 1955, 188; Jaanits 1959, 64, Таблица I, 74–75, Таблица XI, XII; Jaanits 1965, 29 Abb. 9), and various kinds of adzes (Jaanits 1955, 189; Jaanits 1965, 21 Abb. 10).

From the periphery of the settlement area (NW part) two individuals – an adult male (III) and a young female (II) – were found (Tõrv 2016). These were adorned with grave goods (Jaanits 1959, 39–40; Jaanits 1965, 17–18). Another grave with the remains of a child (I) in a depth of 115 cm from the topsoil was found on the SE part of the settlement. In this case only the skull and some other bones (Jaanits 1959, 39; Jaanits 1965, 18; Jaanits *et al.* 1982, 68) were detected.

Due to the poor collagen preservation none of the three graves are dated (Tõrv 2016). Grave descriptions given after Tõrv (2016).

- Valma I, a child; partially preserved; without grave goods. No direct radiocarbon date.
- Valma II, an adult male; buried on back with both upper and lower limbs in extension; grave goods present. Probable collective burial, placed into the same grave with individual no. III. No direct radiocarbon date.
- Valma III, a young woman; buried on back with both upper and lower limbs in extension; grave goods present. Probable collective burial, placed into the same grave with individual no. II. No direct radiocarbon date.

#### Kääpa, Estonia

Kääpa is a settlement site located on the left bank of the Võhandu River, c. 5–10 km north-east of the Tamula settlement and burial site. The site was discovered in 1958 during the construction work of a bridge (Aun 1963, 9), and excavated in 1959–1962 and 1974 by Jaanits (Jaanits 1976, 45–48). Similar to Tamula and Akali, the cultural layer at Kääpa is covered with peat, which indicates that during the habitation of the site, the water level at Võhandu River was lower than it is today (Aun 1963, 10; Jaanits 1968, 14–15). The find material is plentiful, being mostly represented by Narva Ware, but also Typical Combed Ware sherds have been found (Aun 1963; Jaanits 1976). During the excavations in 1962, single human bones and cranial fragments were found from Kääpa (Aun 1963, 12).

Kääpa I, an almost complete cranium with maxillary teeth of an adult individual are stored in the Archaeological Research Collections at the Tallinn University (AI 4245). No direct radiocarbon date.

#### Narva Joaorg, Estonia

Narva Joaorg is located near the present town of Narva on the eastern border of Estonia of the western bank of the Narva River. The site was discovered in 1953 and in 1954 and 1957 Jaanits carried out preliminary surveys that were followed by extensive excavations in 1960 and 1962–1964. Narva Joaorg is a multi-layered and multi-cultural site consisting of three pre-ceramic Mesolithic layers and a Mesolithic/Early Neolithic layer with both Narva Ware and Typical Combed Ware present (Jaanits 1954; Jaanits 1965b, 37–42; Jaanits & Liiva 1973, 158; Jaanits *et al.* 1982, 44). The oldest settlement layer was situated directly above the limestone bedrock. The radiocarbon dates from the Mesolithic layers date the site to c. 6600–4200 cal. BC, being the earliest known human occupation in the Narva-Luga region (Rosentau *et al.* 2013, 927).

The descriptions of graves (AI 4264) are given after Tõrv (2016), whereas all of these comprise of loose, i.e. not fully articulated, human bones. No direct radiocarbon dates are available from human bone due to poor collagen preservation (Tõrv 2016):

- Narva Joaorg I, probable male, adolescent, in the I Mesolithic layer, no grave goods. No direct radiocarbon date.

- Narva Joaorg II, an adult, in the II Mesolithic layer, no grave goods. No direct radiocarbon date.
- Narva Joaorg IV, an adult, in the III Mesolithic layer, grave goods. No direct radiocarbon date.

### Biržai, Lithuania

The single burial site is located within the limits of the Biržai town in the northern part of Lithuania. Grave was originally placed at the edge of a steep and clayey bank (elevation up to 53 m a. s. l.) of the river Apaščia, some few hundred meters south from where it meets one of its tributaries – the river Agluona. In the 16<sup>th</sup> c. the dam was built on the confluence of above-mentioned rivers, creating the artificial lake Širvėna. The placement of the burial site in the landscape is very similar to Benaičiai case as there are valleys of the rivers Apaščia to the east and Agluona to the west as well as a steep slope descending to what used to be the wet grasslands that are flooded at the present.

The grave was partially destroyed during the construction works in 2013 and then rescue excavations took place in 2014 uncovering the single grave dating to the Late Neolithic period (Duderis 2015).

- Biržai 1, 30-35 year old male (Poz-64678; 3955 ± 30 BP, 2570–2350 calBCE)

### Donkalis settlement and burial site

The site comprises of a settlements dating to the Mesolithic, Late Neolithic and Early to Middle Bronze age and burials dated to a Mesolithic and Neolithic periods. It is located in the central north-western part of Lithuania. It is situated on a glacial kame formation (elevation up to 156 m a. s. l.) towering above the marshy northern part of the lake Biržulis where the rivulet Druja flows into it. In some stages of the Stone age the kame may have been an island (Butrimas 2012; Butrimas et al 1985; Kunskas & Butrimas 1985).

After the first melioration of the lake in the 1930's the site became accessible on foot and local residents started exploiting it for gravel quarrying. The site caught archaeologists' attention only in 1979 when a local child told them about human bones being constantly uncovered during gravel extraction. Site was excavated in 1981-1983) resulting in the discovery of 7 undisturbed inhumation graves among numerous pottery fragments, flint artefacts and pits. Three out of 7 graves (no. 2-4) were C14 dated to the Middle Mesolithic, Early Neolithic and Late Mesolithic periods, respectively, but the director of the excavations argues that 3 above-mentioned graves together with one more grave (no. 5) belong to the Middle – Late Mesolithic with the rest of them (no. 1, 6-7) dating to the Late Neolithic period (Butrimas 2012). The authors of this article suggest that there are some flaws considering the chronology of Donkalis graves. These issues are addressed in more detail further in the text. Minimal number of individuals (MIN) determined from the

bones collected in the vicinity of the destroyed part of the kame shows that graves of at least 6 more individuals were destroyed during quarrying (Butrimas et al 1985).

- Donkalnis 1, ~20 year old female, no direct dating.
- Donkalnis 4, 50-55 year old male (OxA-5924;  $6995 \pm 65$  BP, 6000–5740 calBCE)
- Donkalnis 5, child (Poz-61589;  $7140 \pm 40$  BP 6075–5920 calBCE)
- Donkalnis 6, 35-40 year old female (Poz-61574;  $5770 \pm 40$  BP, 4720–4530 calBCE)
- Donkalnis 7, ~50 year old male (Poz-61576;  $6220 \pm 90$ , 5460–4940 calBCE)

#### Gyvakarai burial site

The burial site is located in the northern part of Lithuania on the steep gravelly bank (elevation up to 79 m a. s. l.) of the rivulet Žvikė, 500 m to the south from where, in the wet grassland valley, it meets the main stem river Pyvesa.

The site was discovered in 2000 when local residents started digging for gravel in the central part of the gravelly bank. The same year rescue excavations were conducted in the surrounding area of the highly disturbed grave resulting in discovery of a single grave C14 dated to the Late Neolithic (Tebelškis & Jankauskas 2006).

- Gyvakarai 1, 35-40 year old male (Poz-61584,  $4030 \pm 30$  BP, 2620–2470 calBCE)

#### Kretuonas settlement and burial site

The Neolithic – Bronze Age settlement and the Neolithic burial site is located in the eastern part of Lithuania. It is situated on a small sandy height (elevation up to 147 m a. s. l.) edged between the lake Kretuonas to the west and marshy remains of the nameless grown up lake to the east (Girininkas et al 1985). Surroundings of the lake Kretuonas are rich in a variety of settlements and burial places dating from the Stone to the Early Middle ages.

The site was discovered in 1978 when the area was being planted with forest. The same year archaeological excavations were started and continued for thirteen years (1978-1980, 1982-1985, 1991, 1994-1997, 1999, 2001). In 1980, six undisturbed graves dating to the Early – Middle Neolithic periods were uncovered in the low-lying and intermittently flooded periphery of dwelling area. Uncovered graves themselves and their placement in the surrounding landscape arguably show signs of unusual burials.

- Kretuonas 1, 20-25 year old female (OxA-5935,  $5350 \pm 130$  BP, 4460–3820 calBCE)
- Kretuonas 2, 14-16 year old juvenile, no direct dating.
- Kretuonas 3, 50-55 year old male (OxA-5926,  $5580 \pm 65$  BP, 4550–4330 calBCE)
- Kretuonas 4, >55 year old female, no direct dating.
- Kretuonas 5, 25-30 year old male (Poz-64677,  $5540 \pm 35$  BP, 4450–4340 calBCE)

- Kretuonas 6, infant, no direct dating.

#### Spiginas settlement and burial site

The Neolithic – Bronze age settlement and the Mesolithic – Neolithic burial site is located in the central north-western part of Lithuania. The settlement is situated on a terrace (elevation up to 156 m a. s. l.) in the centre of which is a glacial kame formation (elevation up to 163 m a. s. l.) with a burial site on top of it. In some stages of the Stone Age this terrace and kame may have been an island in what is now a marshy southern part of the lake Biržulis (Butrimas 2012, 1992; Kunskas & Butrimas 1985).

This site is different from the others because it was discovered by professional archaeologists from the very beginning which led to two years of excavations (1985 – 1986). During these excavations 4 graves were discovered and C14 dated to the Middle Mesolithic, Middle Neolithic and Late Neolithic periods (Butrimas 2012).

- Spiginas 1, 35-45 year old male (Poz-61572,  $5470 \pm 40$  BP, 4440–4240 calBCE)
- Spiginas 2, 50-55 year old male (Poz-61573,  $3580 \pm 60$  BP, 2130–1750 calBCE)
- Spiginas 3, female (OxA-5925,  $7780 \pm 65$  BP, 6400–6240 calBCE)
- Spiginas 4, 30-35 year old female (Gin-5571,  $7470 \pm 60$  BP, 6440–6230 calBCE)

#### Plinkaigalis burial site

The burial site is located in the plains of central Lithuania on the eastern bank of the river Šušvė on the outskirts of the Plinkaigalis village, approximately 400 m south-east of an Iron age hill fort and settlement (Kazakevičius 1993). It is a relatively plain area, which is nevertheless distinguished from the surroundings by a low (up to 2 m height) moraine hill of sand and gravel (elevation up to 94 m a. s. l.).

The burial site was discovered in 1975 when local residents started digging for gravel in the western part of the hill. The same year site was granted a legal protection with archaeological excavations carried out for eight straight years in a row (1977-1984). During the eight years of fieldwork a total of 373 graves (364 inhumation and 9 cremation graves) with all but two of them dating to 3<sup>rd</sup> to 8<sup>th</sup> c. AD were uncovered (Kazakevičius 1993). The two exceptional graves (no. 241, 242) were uncovered in the northern part of the burial site and C14 dated to the Late Neolithic (Ramsey et al 2000).

- Plinkaigalis 241, 50-55 year old female (OxA-5928,  $4030 \pm 55$  BP, 2860–2410 calBCE)
- Plinkaigalis 242, >40 year old female (OxA-5936,  $4280 \pm 75$  BP, 3260–2630 calBCE)

#### Turlojiškė archaeological complex, Lithuania

The Turlojiškė archaeological complex is a group of settlement, burial, sacrificial, and other archaeological sites in a large, peaty area on the right bank of the river Kirsna in south-western part of Lithuania. The relief of this area is almost level, slightly undulating in places, with elevated areas in the northern and southern parts. The river Kirsna is in the western part of the area, the small Turlojiškė forest in the east, the grove Gojus located in the north on the grounds of the Jakimavičius family farmstead, and level cultivated fields in the south (Merkevičius 2012). The first written record about archaeological finds from the area reached us from 1930 (Lietuvos Aidas 1930), in 1931 another paper was written on a human skull called „Kirsna man“ (Žilinskas 1931), which later turned out to be a skull of 35-40 year old male (Česnys 2001).

A more precise location of the find spot of the aforementioned finds was not known until field surveys and excavations were conducted from 1995 to 2003. During the excavations 6 additional male graves were discovered and some of them were C14 dated to Bronze age (Merkevičius 2012).

- Turlojiske 3, 25-30 year old male (Vs-1188, 2736±60 BP, 1010-800 calBCE)
- Turlojiske 4, 20-25 year old male (Ua-16681, 2590±75 BP, 908-485 calBCE)
- Turlojiske 1999.5, 20-25 year old male.
- Turlojiske 1999.6, 20-25 year old male.
- Turlojiske1996.1, 35-45 year old male (Poz-66904, 2730 ± 30 BP, 930–810 calBCE)
- Turlojiske 1932, 20-30 year old male („Kirsna man“) (OxA-5931, 2895 ± 55 BP, 1230–920 calBCE)
- Turlojiske 1948, 25-35 year old male.

### Kivutkalns, Latvia

The Kivutkalns hill-fort and cemetery was located on the island of Dole, on the lower course of the River Daugava, on a sandy spit of land formed by the former shore of the Daugava and the bed of a former river channel that is nowadays hard to distinguish. The Kivutkalns site was totally excavated under the direction of Jānis Graudonis in 1966 and 1967 in connection with the building of the Riga Hydroelectric Plant.

The site has been considered as the largest Late Bronze Age bronze-working centre in Latvia. One third of the archaeological artefacts found at Kivutkalns hill-fort in the lower Daugava river is related to bronze working (Vasks 2010). The Kivutkalns was a double monument: according to archaeological evidence, a fortified residential site had been established directly on top of what had originally been a burial site. This in itself is an unusual, even unique case: the establishment of a hill-fort on top of a prehistoric cemetery. Based on <sup>14</sup>C dating and artefactual dating, the hill-fort was placed in the 1st millennium BC (Graudonis 1989). Radiocarbon datings of bone

samples (by Finnish Museum of Natural History, 2008 and 2011) indicated 2543 to 2576 years BP for animal bones, found in hillfort, and 2475 to 2555 BP for human bones, found in cemetery.

Combining the new animal bone data to old radiocarbon dates of charcoal provides supporting evidence for archaeological consensus date of the hill-fort usage during the first millennium BC. Five human bone collagen  $^{14}\text{C}$  datings are surprisingly young and suggest that periods for cemetery and hill-fort usage were overlapping.

The cultural layer, with a thickness of 1.6–3 m protected the cemetery from the harmful effects of the atmosphere and precipitation and in combination with the encasing of the burials in oak log it resulted in an exceptionally good preservation of the skeletons. All the burials in the cemetery were preserved (247 inhumations and 21 cremations, Denisova, Gravere, Graudonis 1985).

For this work, all the studied individuals were radiocarbon dated and the results are given below (see also Table 1). Generally, the dates are consistent with the earlier measurements. Full discussion on the dates incorporated with dietary isotopic signals and potential reservoir effects is published elsewhere (Oinonen et al 2017).

- Kivutkalns 19. Male aged 40-50 (Hela-3746,  $2403 \pm 24$  BP, 730-400 calBCE), on the back in an oak log. A bone needle on the breast. 14 stones arranged around burial, white sand strewn below it.
- Kivutkalns 25. Male aged 35-40 (Hela-3738,  $2545 \pm 30$  BP, 800-545 calBCE), on the back in an oak log. 4 stones arranged around burial, white sand strewn below it.
- Kivutkalns 207. Female aged 40-50 (Hela-3743,  $2511 \pm 30$  BP, 790-535 calBCE). in an oak log. White sand strewn below burial. A bone needle on the back.
- Kivutkalns 194. Male aged 30-40 (Hela-3737,  $2298 \pm 28$  BP, 405-230 calBCE), on the back in an oak log. A bone needle on the breast.
- Kivutkalns 209. Male aged 25-33 (Hela-3741 and 3742,  $2497 \pm 30$  and  $2556 \pm 30$  BP, 785-515 and 805-550 calBCE) in an oak log. Stones arranged at the head part of burial. White sand strewn below burial. Both mandible (Hela-3741) and maxilla (Hela-3742) were dated.
- Kivutkalns 215. Disturbed. Female aged 18-22 (Hela-3745,  $2462 \pm 27$  BP, 760-425 calBCE), without any artefacts.
- Kivutkalns 42. Female aged 35-42 (Hela-3740,  $2573 \pm 30$  BP, 810-560 calBCE), possibly in a linden coffin. No artefacts.
- Kivutkalns 222. Male of big stature, aged 60-70 (Hela-3736,  $2423 \pm 26$  BP, 745-400 calBCE), on the back in an oak log. A fragment of bone needle at the left side of the breast. A stone at the head of burial. White sand strewn below burial.
- Kivutkalns 153. Male aged 45-55 (Hela-3744,  $2542 \pm 29$  BP, 800-545 calBCE), without artefacts.

- Kivutkalns 164. Aged 18-25 (Hela-3739,  $2385 \pm 30$  BP, 730-390 calBCE), without artefacts.

## Scandinavia

Archaeological finds show a human presence in Denmark and the south Swedish province of Skåne during the Lateglacial, when most of the Scandinavian peninsula still was covered by glaciers (Larsson 1994, Larsson et al. 2002, Knarrström 2004, Fischer et al. 2013). The ensuing Preboreal period saw a rapid colonization over large tracts of lands, with settlements established all along the coasts of Norway and West Sweden (Nordqvist 2000: 182-197, Kindgren 2002, Bjerck 2009, Schmitt et al. 2009, Fuglestad 2012, Breivik 2014, Jaksland & Persson 2014), and also some sites known from Eastern and Northern Sweden as well as Northern Finland (Kankaanpää & Rankama 2011, Möller et al. 2012, Hallgren in press). The Early Mesolithic archaeological assemblages differ between the South-West and the North-East, suggesting that groups with contrasting technological traditions entered the Scandinavian peninsula from different directions: One northern route through Finland that brought the post-Swiderian tradition, and a southern route through Denmark that brought the post-Ahrensburgian tradition (Kankaanpää & Rankama 2011, Knutsson & Knutsson 2012, Sørensen et al. 2014). It is also possible that humans crossed the Baltic by boat or on the sea ice of winter. Regional differences in material culture and technological traditions during the subsequent millennia of the Mesolithic (eg. Hallgren 2004, David 2009, Sørensen et al. 2014, Bergsvik & David 2015), may partly be related to patterns that were already established during the colonization process, but may also be a result of later spread of traditions through social networks and/or resettling of groups of hunter-gatherers.

Around 4000 calBCE agriculture was introduced into South Scandinavia, along with a characteristic set of material culture known as the Funnel Beaker Culture (FBC or in the following TRB after the German term *Trichterbecherkultur*) (Price 2000, Fischer 2002, Hallgren 2008, 2011, Sørensen 2014, Andersson et al. 2016). There are a few examples of domesticates that pre-date this event, in the form of carbonised cereal grains, imprints of cereal grains in Mesolithic pottery and bones from domestic animals (Koch 1998 p.49-50, Jennbert 2011, Sjögren 2011, Sørensen 2014), but it is only after 4000 calBCE that evidence of farming and cattle rearing becomes abundant in Denmark and South Sweden. Cattle was not only a source for meat, but was also used for dairy production (Craig et al. 2011, Isaksson & Hallgren 2012, Gron et al. 2015, Andersson et al. 2016). Material culture that can be considered part of the Funnel Beaker tradition also appear in South Norway, but here evidence of agriculture remain elusive or at best sporadic (Hjelle et al. 2006, Østmo 2007, Hallgren 2008: 245-250, Bergsvik & Østmo 2011, Glørstad 2012, Solheim 2012, Reitan & Persson 2014). In the region of Denmark and South Sweden where agriculture do occur, it was practised along side hunting, gathering and fishing (Price 2000, Fischer 2002, Andersen 2008, Craig et al. 2011, Andersson et al. 2016).



In Southernmost Sweden, Denmark and adjacent Northern Germany pottery was produced locally already during the Mesolithic Ertebølle phase. The introduction of the TRB pottery tradition meant a change in technology and design that can be viewed as sudden or gradual depending on perspective (Koch 1998, Fischer 2002, Andersen 2011, Hartz 2011, Sørensen 2014). In Central Sweden and Southern Norway TRB pottery was the first ceramic tradition to appear, and thus clearly have an origin outside of these regions (Hallgren 2011, Glørstad 2012). The lithic industries tend to show a degree of continuity between the Late Mesolithic and Early Neolithic in most areas (Stafford 1999, Hallgren 2008, Solheim 2012). From a regional perspective, it is possible to distinguish TRB regions with specific designs and traditions that more or less mirror the geographic extent of Late Mesolithic traditions. This is also true on a pan-regional scale, where the Northern limit of the Scandinavian Funnel Beaker Culture coincide with the Northern limit of Late Mesolithic traditions (Hallgren 2003, Hallgren 2008).

The nature of the transition to the Neolithic in Scandinavia has been debated since the birth of Scandinavian archaeology, and the change has variously been put down to migration or internal development (Kristiansen & Fischer 2002). During the last couple of decades two basic models has dominated the Scandinavian archaeology. One model sees the introduction of agriculture as a consequence of interaction, gift giving and intermarriage through social networks that connected foragers and farmers (Fischer 2002, Hallgren 2003, Jennbert 2011). The other model envisions agriculture as brought by migrating farmers seeking new lands (Rowley-Conwy 2004, 2011, Sørensen 2014). The former model put emphasis on the *continuity* between the Late Mesolithic and the Early Neolithic in terms of lithic technology and complex subsistence practices like seal hunting. The latter model put emphasis on elements that show *discontinuity* like new designs of material culture and the introduction of complex new subsistence practices like cultivation and dairy farming.

At the transition between the Early and Middle Neolithic, c. 3300 calBCE, several changes can be seen in the archaeological record of Sweden. In Skåne and Western Central Sweden a large number of megaliths (dolmens, passage graves) were erected, and a new set of pottery and stone tools of new designs were introduced (Malmer 2002, Sjögren 2010, 2011). This material is known as the Middle Neolithic Funnel Beaker Culture. The change seems to be accompanied by a larger reliance on agriculture (Lidén 1995, Welinder 1998, Sjögren 2003).

The development was quite different in Eastern Central Sweden, where the settlement pattern shifted to the coast (Larsson 2009a). All known interior TRB settlements of an agricultural character were abandoned, and coastal sites previously used as seasonal camps for fishing and sealing were turned into more or less permanent settlements (Hallgren 2008, 2009, Larsson 2009a). While there are traces of small scale agriculture at several of these coastal localities (eg. carbonised cereal seeds, cf. Edenmo & Heimdahl 2012, Andersson 2013), the bulk of the subsistence economy seem to have shifted towards marine resources like fish and seal (Segerberg 1999,

Storå 2001, Eriksson 2004, Fornander et al. 2008, Olson 2008, Larsson 2009a). The economic change was accompanied by a change in material culture, particularly pottery design (Larsson 2009a). The archaeological assemblages from this phase is known as the Pitted Ware Culture (PWC). It should be emphasised that the change in material culture was gradual, and that the pottery of the first phase of the PWC retained the funnel-beaker shape, with changes mainly confined to the composition of the decoration, and the surface treatment of the vessels (Hallgren 2009, Larsson 2009a, 2009b).

The archaeological terminology with monikers like “Early Neolithic Funnel Beaker Culture”, “Middle Neolithic Funnel Beaker Culture”, and “Pitted Ware Culture” seem to imply a continuity between the Early and Middle Neolithic TRB, and a discontinuity between the EN TRB and PWC. However, it is important to recognise that this terminology was caused by research historical happen stance during the early 20<sup>th</sup> century (Larsson 2009a, Hallgren 2009, 2012). From the perspective of material culture, there is as much continuity between the EN TRB and the PWC, as between the Early and Middle Neolithic TRB.

The phase of the Pitted Ware Culture that display a clear continuity with the preceding EN TRB, the Fagervik II stage, is primarily known from the former EN TRB areas of mainland and coastal archipelagos of Eastern Central Sweden (Meinander 1957, Segerberg 1999: 82). The early PWC also appear in the regions immediately to the north of the EN TRB area, regions that were occupied by aceramic hunter-gatherers during the preceding phase (the latter groups are sometimes included under the term Slate Culture, cf. Brøgger 1906, Hallgren 2009, 2012). This may be a territorial expansion of the EN TRB turning PWC, or local hunter-gatherers finally adopting the ceramic technology of their neighbours. An indication that the latter scenario may be right is the fact that there is a simultaneous transfer of technology going in the other direction: the use of the raw material slate for the production of polished arrow and spear points that become an important part of the PWC (Taffinder 1998, Hallgren 2009).

During the following phases (Fagervik III, IV etc) the Pitted Ware phenomenon spread over a larger area (Browall 1991), including the Baltic islands of Öland and Gotland (Sweden) and Åland (Finland). While the former two islands have traces of a TRB presence during the Early Neolithic, the Åland island had for millennia been settled by groups of hunter-gatherers of the Comb Ware tradition (Stenbäck 2003, Hallgren 2004). Stylistic borrowings from the Comb Ware tradition can be traced already in the EN TRB of Eastern Central Sweden, and the creation of the material culture of the PWC can be seen as the continuation of this process, with a blend of western and eastern ceramic traditions (Timofeev 2000, Hallgren 2009, 2012, Larsson 2009a). During the later phases of the PWC the funnel-beaker shape was abandoned and instead pots were designed with pointed bottoms, akin to East Baltic hunter-gatherer pottery.

From an archaeological point of view then, the Pitted Ware Culture could perhaps be seen as a mix of at least three components: The Early Neolithic Funnel Beaker Culture of Eastern Central Sweden, the Slate Culture of Dalarna and southern Norrland, and the Comb Ware Culture of Åland. It is likely that such a process also had consequences for the genetic composition of the resulting population.

Around 2800 calBCE – at the transition between Middle Neolithic A and Middle Neolithic B according to the Scandinavian terminology – a new set of material culture appear in the archaeological record of South Sweden and Norway, referred to as the Swedish-Norwegian Battle Axe Culture (Malmer 1962, 2002, Larsson 2009a). This is a regional version of the pan-European Corded Ware Culture (CWC). The Swedish CWC is represented by graves and more rarely settlement sites throughout South and Central Sweden, with a northern limit at the 60th parallel North. In the south Swedish province Skåne there are also palisade structures known (Brink 2009). In many regions the archaeological remains of the CWC replace or follow on the preceding MN TRB. This has variously been interpreted as the result of internal development, limited population movements or full scale migrations (Malmer 1962, Larsson 2009a, cf. Kristiansen 1991, Damm 1993). Recent research has stressed the similarities between the early phase of the Swedish CWC and the CWC of Finland, the Baltic Countries and northern Poland (Larsson 2009a p.254-261).

In eastern South and Central Sweden the CWC appear alongside the Pitted Ware Culture (Malmer 2002, Larsson 2009a). While the latter have a clear association with the coast, due to the subsistence focus on fishing and sealing, the settlements and graves from the CWC are often found in the interior, without a direct association with water. The data on the subsistence of the CWC is sparse, but include domesticated animals, cereal crops and wild forest game (Hallgren 2000, Welinder 1998, Malmer 2002, Larsson 2009a).

The northernmost provinces in Sweden with settlements and graves of the traditional CWC are Uppland and Västmanland in eastern Central Sweden. Most of Northern Sweden remained the territory of hunter-gatherers, but there also appear a small number of sites along the coast that contain archaeological material associated with the CWC (Baudou 1992). These sites are of two types, one of which have been interpreted as the result of direct long distance (1500 km) colonization by CWC groups originating in South Scandinavia, the other type show a larger degree of continuity with the local hunter-gatherer traditions, but with additions of cultivated plants and stylistic or technological borrowings that suggest contact with the CWC tradition.

The former category is best exemplified with a series of sites in Västerbotten, eg. Bjurselet, a settlement where close to 200 flint axes have been found, despite being located some 1500 km north of the nearest flint sources of South Scandinavia (Knutsson 1988, Baudou 1992 p.71-74, Olausson et al. 2012). The lithic reduction done at Bjurselet suggest that the knappers were schooled in the technological

tradition of South Scandinavia (Knutsson 1988). The other category is exemplified by the sites Hedningahällan in Hälsingland and Bjästamon in Ångermanland (Schierbeck 1994, Holm 2006, Gustafsson & Spång 2007). These settlements contain lithic industries typical of the local hunter-gatherers eg. tools of slate and quartz, but in the case of Hedningahällan also fragmented CWC battle-axes, osteological assemblages dominated by seal and fish, but also finds of carbonised cereal seeds. The pottery is of a regional character, although with some stylistic traits reminiscent of Corded Ware (Larsson & Graner 2010). The human crania from Ölsund, Forsa, Hälsingland discussed in the current paper has been found in the same region as the site Hedningahällan and date to the same phase (Hallgren 1996).

#### Kanaljorden, Motala, Sweden

Kanaljorden, Motala, is a Mesolithic settlement and ritual complex in the town of Motala, Östergötland, Sweden (Hallgren 2011, Hallgren & Fornander in press). Motala cradles the outlet of the big lake Vättern into the river Motala Ström, which in turn discharge into the Baltic Sea. The site Kanaljorden (Motala parish ancient monument 187) is close to both river (100 m) and lake Vättern (300 m), but is situated on the rim and bottom of a separate wetland basin that constituted a small isolated lake during the time in question. Today the area is a peat bog, and is also covered by recent landfill and development.

The human remains that has been subjected to DNA-analysis where found on a man made 12 x 14 m stone-packing that had been constructed on the bottom of the small lake during the Mesolithic. The stone-packing was completely submerged and covered by at least 0,5 m of water at the time of use. The ritual depositions include human bones, mostly skulls and fragments of skulls of adults (21 finds) but also some stray postcranial bones from adults (10) as well as the bones of one infant. The latter find include bones from all parts of the body. The initial sampling for DNA of the Kanaljorden material was done before to the full osteological analysis to avoid DNA contamination. Each isolated find of a crania/crania fragment with part of the maxilla preserved, was numbered as individuals 1-9 during the sampling process, while the bones of the infant was numbered individual 10. A fragmentary find that was assigned as 11 during sampling, was retracted before analysis as the bones turned out to be non-human (was first believed to be fragments of a child crania). A disarticulated mandible was designated individual 12.

The osteological analysis that were done later calculated the MNI to ten based on the number of occipital bones, nine adults and one infant. This match the preliminary approximation based on the number of maxilla's, although based on different bone elements (Gummesson & Kjellström manuscript).

The DNA analysis of six of the crania and the mandible confirmed that each of these finds represent a unique individual (Haak et al. 2015, Lazaridis et al. 2014). Osteological observations and isotope analysis furthermore show that the mandible do not match any of the three remaining "individuals" from whom no DNA data are available (Eriksson et al. 2016, Gummesson & Kjellström manuscript). Furthermore,

considering the result of isotope analysis and overlap of bone elements, one fragmentary skull that lack a maxilla can be recognised as an additional individual, given the designation AA. In all this mean that a total of 12 individuals so far has been identified in the Kanaljorden assemblage (individuals 1-10, 12 and AA).

Two of the skulls were mounted on wooden stakes still embedded in the crania at the time of discovery, indicating that the skulls have been put on display prior to the deposition in to the lake. Beside human bones, the ritual depositions also include artefacts of antler, bone, wood and stone, animal carcasses/bones as well as nuts, mushrooms and berries. The fauna assemblage is dominated by bones from wild boar and brown bear, but also include elk (moose), red deer, roe deer, badger, beaver, pond turtle and pike. The depositions of artefacts include smooth bone points, barbed bone points, a bone point with flint inserts, antler pick axes and scrapers/knives made of wild boar tusk.

Direct dates on 18 human bones range between  $7013 \pm 76$  and  $6677 \pm 31$  BP, disregarding one outlier ( $7212 \pm 109$ ) which could not be confirmed by a duplicate date ( $6773 \pm 30$ ). Dates on animal bones (N=13) and tools made of bone and antler (7) range between  $6935 \pm 47$  and  $6611 \pm 30$  BP. The human samples may be affected by a moderate reservoir effect (Eriksson et al. 2016). The time range indicated by the series of dates correspond to the end of the Middle Mesolithic of Scandinavia.

- Motala 300, ind. 7, skull mounted on wooden stake, 30-50yrs. (Ua-42121,  $7013 \pm 76$  BP, 6016-5739 calBCE)
- Motala 307, ind. AA, adult female, same as Motala 317 and 1913.
- Motala 309, ind. BB, male, >30yrs, poss. same as ind. 6 (Ua-51717,  $6836 \pm 32$  BP, 5781-5650 calBCE)
- Motala 311, adult (Ua-51718,  $6965 \pm 31$  BP, 5971-5751 calBCE)
- Motala 313, adult (Ua-51719,  $6758 \pm 32$  BP, 5716-5626 calBCE)
- Motala 314, ind. BB, poss. same as ind. 6
- Motala 317, ind. AA, adult female, same as Motala 307 and 1913
- Motala 318, skull mounted on wooden stake, adult (Ua-51720,  $6770 \pm 31$  BP, 5719-5631 calBCE)
- Motala 363, ind. 1, adult female (Ua-42116,  $6701 \pm 64$  BP, 5721-5515 calBCE)
- Motala 1913, ind. AA, adult female, skull fragment found inside skull of ind. 1, same as Motala 307 and 317 (Ua-42645,  $6735 \pm 44$  BP, 5722-5564 calBCE)
- Motala 4352, skull fragment with injury from a pointed object, adult >25 yrs (Ua-51721,  $6896 \pm 31$  BP, 5844-5718 calBCE)

#### Kvärlöv Kalkkälla, Saxtorp, Sweden

The site Kvärlöv Kalkkälla (Saxtorp parish ancient monument 61), Skåne, Sweden is an offering-fen of the Funnel Beaker Culture (TRB), situated in the outskirts of the

modern village Kvärlöv (Nilsson & Nilsson 2003). The fen is characterised as a spring mire, and is believed to have been rather shallow with varying water level. The material under consideration here date to the Scandinavian Early Neolithic (4000-3300 calBCE). During the Early Neolithic the spring mire was located on a gentle slope facing a narrow bay of the sea, some 50-100 m away, and 200 m from the mouth of the small river Kvärlövsån.

The Early Neolithic (EN) assemblage was found in a layer of sand mixed with fen peat. The find bearing EN layer has an extent of 350 m<sup>2</sup>, which gives a rough estimate of the extent of the wetland at this time (Nilsson & Nilsson 2003, Regnell & Sjögren 2006b p.61-65). The finds include 39 disarticulated human bones (0,7 kg). Three fragmentary crania are designated as numbered individuals 1, 2 and 3 in the osteological report, albeit with some reservation regarding the identification of Individual 3 in relation to Individual 2 (Nilsson & Nilsson 2003 p.291). As the radiocarbon dates from these two finds are significantly different (Test statistic T 7.22, Xi<sup>2</sup>(.05) 3.84, degrees of freedom 1) they likely represent two different individuals. The remaining human bones may represent the same or additional individual, seven of these have been included in the initial screening for aDNA.

Besides human bones, the spring mire also contained fragmented funnel-beaker pottery, knapped flint, hazel nut shells, raspberry seeds and animal bones. The fauna assemblage is dominated by domesticated species (cattle, sheep/goat and pig) but also include various wild animals as roe deer, red deer and seal. A dagger made of cattle bone has been <sup>14</sup>C-dated to the same period as the human remains (Ua-25501 4810±75), while bones from sheep/goat and pig are slightly younger and fall in the beginning of the Scandinavian Middle Neolithic (Ua-25499 4470±60, Ua-25500 4550±60) (Nilsson & Nilsson 2003).

There are two Early Neolithic TRB settlement sites in the immediate vicinity, the site Saxtorp (Saxtorp parish ancient monument 26), just 50 m North of the spring mire, and the settlement site Kvärlöv (Saxtorp parish ancient monument 23) 350 m to the South-East. The Early Neolithic phase at the Saxtorp settlement is represented by one singled ailed house, 19 x 6 m, and associated features and finds. The find material include funnel-beaker pottery, cereal seeds, hazel-nut shells and knapped flint. <sup>14</sup>C-dates from features in the house indicate that it was in use during the later phase of the Early Neolithic. The settlement site Kvärlöv date to the first half of the Early Neolithic, and contain an oval post built house, 7,5 x 4,5 m, as well as two graves (skeletons not preserved) and features interpreted as wells or watering pits. The finds include fragmented funnel-beaker pottery, knapped flint, teeth from cattle, cereal seeds and a quernstone (Nilsson & Nilsson 2003, Andersson 2004 p.70-72, Regnell & Sjögren 2006a, Andersson et al. 2016).

- Saxtorp 389, adult <40 yrs.
- Saxtorp 462T, older adult.
- Saxtorp 4815.

- Saxtorp 316\_5527\_5817
- Saxtorp 5092, ind. 1, 20-30 year old female (Ua-9810, 4760±75 BP; Ua-9811, 4520±80 BP, mean 4648 ± 55 BP, 3631-3140 calBCE)
- Saxtorp 5094, ind. 2, adolescent or young adult female (Ua-9809, 4690 ± 75 BP, 3645-3196 calBCE)
- Saxtorp 5158T, adolescent (Ua-52673, 4686 ± 28 BP, 3625-3371 calBCE)
- Saxtorp 5164, ind. 3, adolescent (Ua-9808, 4975 ± 75 BP, 3945-3647 calBCE)
- Saxtorp 5477, ind.3, same as Saxtorp 5146.
- Saxtorp 5478, same individual as either 5092 or 5094.

#### Ölsund, Hälsingland, Sweden

The human cranium from Ölsund, Forsa parish, in Hälsingland is a stray find exposed by ditching of wetland forest (Hallgren 1996). The find-spot (Forsa parish ancient monument 416) is below the Stone Age sea level, the crania may be the remains of a drowned individual, or a person buried in the sea. Ölsund is located 20 km from the contemporary settlement site Hedningahällan, with an assemblage that show a mix of local hunter-gatherer tradition and CWC influences (cf. above). The crania belong to an individual between 28 and 45 years of age (Gummesson *manuscript*). Compared to a modern skeleton, the features are robust, but less so than many males from Stone Age Scandinavia. There are some traits that point towards the identification of the cranium as female (*tubera frontalia* and *occipitalia*).

- Ölsund, 28-45 y old adult (Ua-2138, 3890±80 BP, 2573-2140 calBCE)

#### **Northwest Russia**

The first indications of settlement in the region of Karelia in the northwest of Russia and southwest of Finland date back to the Mesolithic, with the earliest find of a fishing net, radiocarbon dated to 9310±120 BP (Miettinen et al. 2008).

This region is relevant to the peopling of Scandinavia after the retreat of the glacial ice sheets, as it lies on one of the proposed eastern routes of settlement (Sørensen et al. 2013), which has also been suggested for the introduction of Saami-like groups (Tambets et al. 2004). Odontometric analyses suggested continuity between the Mesolithic population of Yuzhnyy Oleni Ostrov and present-day Saami (Jacobs 1992).

#### Yuzhnyy Oleni Ostrov, Archangelsk, Russia

The Mesolithic site Yuzhnyy Oleni' Ostrov (*Oleneostrovski' mogilnik* or *Deer Island cemetery*), Onega Lake, Karelia, Russian Federation (61°30'N 35°45'E) was first discovered in the 1920s during quarrying activities, which unfortunately resulted in the destruction of large parts of the graveyard. Archaeological examination and professional excavation of the site by Soviet archaeologists in the 1930s and the

1950s eventually led to the discovery of 177 burials (Gurina 1956), while the original size of the burial ground was estimated to have held up to 500 individuals (O'Shea & Zvelebil 1984). The abundance and diversity of grave goods and various mortuary features render the Yuzhnyy Oleni Ostrov site exceptional among other Mesolithic sites in Europe. The site had first been identified as a Neolithic graveyard, but later reanalysis and radiocarbon dating revealed an age of around 7,700–7,300 uncalibrated years BP (Price & Jacobs 1990, Wood 2006). Skeletal remains and artifacts from this site are currently held at the Kunstkamera Museum, St Petersburg, Russia.

Co-analyzed with new data is the genome-wide data of Uz00-40 and UZOO-77 from this site which has been reported in previous studies (Haak et al. 2015, Mathieson et al. 2015).

- UzOO77, female, 7,450-6,950 calBP, layer date based on associated individuals from the graveyard (Price & Jacobs 1990)

#### Popovo, Archangelsk, Russia

The Mesolithic site is located on the bank of the Kinema River, in the Archangelsk region (64°32'N 40°32'E). The dates obtained for this site range between 9,000–9,500 BP and 7,500–8,000 BP (Oshibkina 1999) and are expected to be revised to younger dates due to freshwater reservoir effects.

- Popovo2, male.

### **Acknowledgements**

Fredrik Hallgren thanks Maj-Lis Nilsson and Erika Rosengren for support regarding Saxtorp, and Elise Hovanta, Anna Larsdotter and Kristina Lindkvist for help regarding Ölsund.

### **References**

- Allentoft, M. E. *et al.* 2015. Population genomics of Bronze Age Eurasia. *Nature* 522, 167-172, doi:10.1038/nature14507.
- Allmäe, R. 2006. Tamula asulakoha matuste antropoloogilised määrangud. 17.10.2006. (Manuscript in TLU AI).
- Allmäe, R. 2011. Stone Age quadruple burial in Veibri village, Tartumaa Estonia – some anthropological data. *Arheoloģija un Etnogrāfija*, 25, 182–189.
- Antanaitis-Jacobs, I. & Girininkas, A. 2002 Periodization and chronology of the Neolithic in Lithuania. *Archaeologia Baltica* 5, 9–39.
- Andersen, S. H. 2011. Kitchen middens and the early pottery in Denmark. In: Hartz, S., Lüth, F. & Terberger, T. (ed.). *Early Pottery in the Baltic – Dating, Origin and Social Context*. Bericht der Römisch-Germanische Kommission 89. Frankfurt: 193-215.



- Andersson, H. 2013. *Stenålder i Åby, bland gravar och gropkeramik*. Arkeologikonsult, Upplands Väsby.
- Andersson, M. 2004. *Making place in the landscape: early and middle Neolithic societies in two west Scanian valleys*. Riksantikvarieämbetet, Lund.
- Andersson, M., Artursson, M. & Brink, K. 2016. Early Neolithic Landscape and Society in Southwest Scania – New Results and Perspectives. *Journal of Neolithic Archaeology* 18: 23-114.
- Baudou, E. 1992. *Norrlands forntid – ett historiskt perspektiv*. Wiken, Höganäs.
- Bergsvik, K-A. & É David. 2015. Crafting bone tools in Mesolithic Norway, a regional eastern-related know-how. *Journal of European Archaeology* 18 (2): 190-221.
- Bergsvik, K. A. & Østmo, E. 2011. The experienced Axe. Chronology, condition and context of TRB-axes in Western Norway. In: Davis, V. & M. Edmonds (eds.). *Stone Axe Studies III*. Oxbow Books, Oxford: 1-20.
- Bjerck, H.B. 2009. Colonizing Seascapes: Comparative Perspectives on the Development of Maritime Relations in Scandinavia and Patagonia. *Arctic Anthropology* 46 (1-2): 118-131.
- Bolz, M. 1914. Das neolithische Gräberfeld von Kiwisaare in Livland. *Baltische Studien zur Archäologie und Geschichte. Arbeiten des Baltischen Vorbereitenden Komitees für den XVI. Archäologischen Kongress in Pleskau 1914*. Berlin: Gesellschaft für Geschichte und Altertumskunde der Ostseeprovinzen Russlands, 15–32.
- Breivik, H. 2014. Palaeo-oceanographic development and human adaptive strategies in the Pleistocene–Holocene transition: A study from the Norwegian coast. *The Holocene* 2014. DOI: 10.1177/0959683614544061
- Brink, K. 2009. *I palissadernas tid: om stolphål och skärvor och sociala relationer under yngre mellanneolitikum*. Lunds universitet, Lund.
- Browall, H. 1991. Om förhållandet mellan trättbägarkultur och gropkeramisk kultur. In: Browall H., P. Persson & K.-G. Sjögren (eds.). *Västsvenska stenåldersstudier*. Göteborgs universitet, Göteborg: 111-142.
- Brøgger, A. W. 1906. *Studier over Norges stenalder. I, Øxer uden skafthul fra yngre stenalder fundne i det sydøstlige Norge*. Dybwad, Christiania.
- Butrimas, A. 2012. *Donkalnio ir Spigino Mezolito – Neolito kapinynai. Seniausio laidojimo paminklai Lietuvoje*. Vilnius: Vilniaus dailės akademijos leidykla.
- Butrimas, A., Kazakevičius, V., Česnys, G., Balčiūnienė, I., Jankauskas, R. 1985. Ankstyvieji Virvelinės keramikos kultūros kapai Lietuvoje. In R. Volkaitė – Kulikauskienė, R. Rimantienė & G. Česnys (eds.). *Akmens amžiaus gyvenvietės ir kapinynai*: 14 – 24. *Lietuvos Archeologija* 4. Vilnius: Mokslas.

Česnys, J. 2001. Reinventing the Bronze Age man in Lithuania: Skulls from Turlojiškė. In *Acta medicina Lithuanica*, 4 – 6, Vilnius.

Craig, O. E., Steele, V. J., Fischer, A. Hartz, S., Andersen, S. H., Donohoe, P., Glykou, A., Saul, H., Jones, D. M., Koch, E. and Heron, C. P. 2011. Ancient lipids reveal continuity in culinary practices across the transition to agriculture in Northern Europe. *PNAS* 108(44): 17910-17915.

Damm, C. 1993. The Danish Single Grave Culture - Ethnic Migration or Social Construction? *Journal of Danish Archaeology* 10: 199–204.

David, É. 2009. Show me how you make your hunting equipment and I will tell you where you come from: Technical traditions, an efficient means to characterize cultural identities. In: S. McCartan, R. Schulting, G. Warren & P. Woodman (eds.), *Mesolithic Horizons; Papers presented at the Seventh international conference on the Mesolithic in Europe*. Oxbow Books, Exeter: 362-367

Denisova R., Gravere R., Gaudonis J.(1985) Bronze age cemetery of Ķivutkalns. Riga. Zinatne.

Der Sarkissian C., Balanovsky O., Brandt G., Khartanovich V., Buzhilova A., et al. 2013. Ancient DNA Reveals Prehistoric Gene-Flow from Siberia in the Complex Human Population History of North East Europe. *PLoS Genet* 9(2): e1003296. doi:10.1371/journal.pgen.1003296.

Der Sarkissian C., Brotherton P., Balanovsky O., Templeton J.E.L., Llamas B., et al. 2014. Mitochondrial Genome Sequencing in Mesolithic North East Europe Unearths a New Sub-Clade within the Broadly Distributed Human Haplogroup C1. *PLoS ONE* 9(2): e87612. doi:10.1371/journal.pone.0087612

Duderis, K., 2015. Tyrimai prie Širvėnos ežero ir Apaščios upės santakos. In G. Zabiela (ed.). *Archeologiniai tyrinėjimai Lietuvoje 2014 metais*. Vilnius: BALTOprint. *In press*

Edenmo, J. & Heimdahl, J. 2012. Gropkeramiskt jordbruk på Södertörn? In: Kihlstedt, B (ed.). *Sittesta – en gropkeramisk boplat under 800 år*. Riksanikvarieämbetet, Stockholm.

Eriksson, G. 2004. Part-time farmers or hard-core sealers? Västerbjers studied by means of stable isotope analysis. *Journal of Anthropological Archaeology* 23(2): 135-162.

Eriksson, G., Frei, K. M., Howcroft, R., Gummesson, S., Molin, F., Lidén, K., Frei, R. & Hallgren, F. 2016. Diet and mobility among Mesolithic hunter-gatherers in Motala (Sweden) – the isotope perspective. *Journal of Archaeological Science: Reports*. <http://dx.doi.org/10.1016/j.jasrep.2016.05.052>.

Fischer, A., Clemmensen, L. B., Donahue, R., Heinemeier, J., Lykke-Andersen, H., Lysdahl, P., Mortensen, M. F., Olsen, J. & Petersen, P. V. 2013, Late Palaeolithic Nørre Lyngby – a northern outpost close to the west coast of Europe. *Quartaer* 60: 137-162.

Fischer, A. & Kristiansen, K. (eds.). 2002. *The Neolithisation of Denmark. 150 Year Debate*. J. R. Collis Publications, Sheffield.

Fischer, A. 2002. Food for feasting? An evaluation of explanations of the neolithisation of Denmark and southern Sweden. In: Fischer, A. & Kristiansen, K. (eds.). *The Neolithisation of Denmark. 150 Year Debate*. J. R. Collis Publications, Sheffield: 343-393.

Fornander, E., Eriksson, G. & Lidén, K. 2008. Wild at heart: Approaching Pitted Ware identity, economy and cosmology through stable isotopes in skeletal material from the Neolithic site Korsnäs in Eastern Central Sweden. *Journal of Anthropological Archaeology* 27(3): 281-297.

Fuglestad, I. 2012. The Pioneer Condition on the Scandinavian Peninsula: the Last Frontier of a 'Palaeolithic Way' in Europe. *Norwegian Archaeological Review* 45 (1): 1-29.

Girininkas, A., Česnys, G., Balčiūnienė, I., Jankauskas, R. 1985. Kretuono I-os gyvenvietės vidurinio neolito kapai. In R. Volkaitė – Kulikauskienė, R. Rimantienė & G. Česnys (eds.): *Akmens amžiaus gyvenvietės ir kapinynai: 5 – 14. Lietuvos Archeologija 4*. Vilnius: Mokslas.

Glørstad, H. 2012. The Northern Province? The Neolithisation of Southern Norway. In: Glørstad, H. & C. Prescott (eds.) *Neolithisation as if history mattered. Processes of Neolithisation in North-Western Europe*. Bricoleur Press, Lindome: 135-168.

Graudonis J. 1989. Hillforts in lower reaches of Daugava. Riga, Zinātne.

Gron K. J., Montgomery J., Rowley-Conwy P. 2015. Cattle Management for Dairying in Scandinavia's Earliest Neolithic. *PLoS ONE* 10(7): e0131267. doi:10.1371/journal.pone.0131267

Gummesson, S. & A. Kjellström. *manuscript*. Osteologisk rapport av humana skelettfynd från Kanaljorden, Motala, Östergötland. OFL, Stockholm.

Gummesson, S. *manuscript*. Osteologisk köns- och åldersbedömning av kraniefynd från Ölsund, Hälsningland. OFL, Stockholm.

Gurina N.N. 1956. Oleneostrovski Mogil'nik. In *Materialy i Issledovaniya po Arkheologii SSSR*. Moscow: Nauka, Akademia Nauk SSSR.

Gustafsson, P. & Spång, L. G. 2007. *Stenålderns stationer. Arkeologi i Botniabanans spår*. Riksantikvarieämbetet, Stockholm.

Haak, W. *et al.* 2015. Massive migration from the steppe was a source for Indo-European languages in Europe. *Nature* 522, 207-211, doi:10.1038/nature14317.

Hallgren, F. & E. Fornander. in press. Skulls on stakes and skulls in water. Mesolithic mortuary rituals at Kanaljorden, Motala, Sweden 7000 BP, in: Grünberg, J. (ed.) *Mesolithic burials - Rites, symbols and social organisation of early postglacial communities*. Tagungen des Landesmuseums für Vorgeschichte Halle, Halle: 161-174.

- Hallgren, F. 1996. En mellanneolitisk skalle från Hälsingland. *Fjölur* 15(1): 5-10.
- Hallgren, F. 2000. Lämningar från stridsyxekulturen på Fågelbacken, Hubbo sn, Västmanland. *Tor* 30: 5-33.
- Hallgren, F. 2003. My place or yours?. In: Larsson, L., Kindgren, H., Knutsson, K., Loeffler, D. & Åkerlund, A (eds.). *Mesolithic on the move*. Oxbow books, Oxford: 592-599.
- Hallgren, F. 2004. The introduction of ceramic technology around the Baltic Sea in the 6<sup>th</sup> millennium. In: Knutsson, H. (ed.). *Coast to coast - landing*. Uppsala University, Uppsala: 123-142.
- Hallgren, F. 2008. *Identitet i praktik. Lokala, regionala och överregionala sociala sammanhang inom nordlig trättbägarkultur*. Uppsala Universitet, Uppsala.
- Hallgren, F. 2009. Early pottery among hunter-horticulturalists and hunter-gatherers in central Fenno-Scandinavia. In: Gheorghiu, D. (ed.). *Early Farmers, Late Foragers, and Ceramic Traditions: On the Beginning of Pottery in the Near East and Europe*. Cambridge Scholars Publishing, Cambridge: 215-238.
- Hallgren, F. 2011a. The early 'Trichterbecher' of Mälardalen, eastern Central Sweden. In: Hartz, S., Lüth, F. & Terberger, T. (ed.). *Early Pottery in the Baltic – Dating, Origin and Social Context*. Bericht der Römisch-Germanische Kommission 89. Frankfurt: 111-134.
- Hallgren, F. 2011b. Mesolithic skull depositions at Kanaljorden, Motala, Sweden. *Current Swedish Archaeology* 19: 244-246.
- Hallgren, F. 2012. Om gropkeramik och dess relation till äldre keramikhantverkstraditioner kring Östersjön. In: P. Bratt & R. Grönwall (eds.). *Gropkeramikerna. Rapport från ett seminarium 2011*. Stockholms läns museum, Stockholm: 31-43.
- Hallgren, F. *in press*. A small Preboreal settlement site at Kanaljorden, Motala, Sweden. In: P. Persson, B. Skar, H. M. Breivik, F. Riede and L. Jonsson (eds.). *Early settlement in north-western Europe: Climate, human ecology, and subsistence*. Equinox Publishing Ltd, Sheffield.
- Hartz, S. 2011. From pointed bottom to round and flat bottom – tracking early pottery from Schleswig-Holstein. In: Hartz, S., Lüth, F. & Terberger, T. (ed.). *Early Pottery in the Baltic – Dating, Origin and Social Context*. Bericht der Römisch-Germanische Kommission 89. Frankfurt: 241-276.
- Hausmann, R. 1904. Ueber Gräber aus der Steinzeit im Ostbaltikum: Grabfunde in Woisek und Kölljal. *Sitzungs-Berichte der Gelehrten Estnischen Gesellschaft*, 1903, 71–81.
- Hjelle, K. L., Hufthammer, A. K. & Bergsvik, K. A. 2006. Hesitant hunters: a review of the introduction of agriculture in western Norway. *Environmental Archaeology* 11(2): 147-170.

Holm, L. 2006. *Stenålderskust i norr. Bosättning, försörjning och kontakter i södra Norrland*. Umeå University, Umeå.

Indreko, R. 1931. Aruanne kaevamistest Harjumaal Kose kihelkonnas 7. mail 1931. (Manuscript in the Institute of History of Tallinn University.)

Indreko, R. 1933. Aruanne kaevamistest Lügänu khk. Püssi vld. Sope kl. Metsvälja tl. maal 9.-13. VIII. 1933. (Manuscript in the Institute of History of Tallinn University.)

Indreko, R. 1935. Sépultures néolithiques en Estonie. *Õpetatud Eesti Seltsi Aastaraamat*, 1933. Tartu, 202–223.

Indreko, R. 1942. Aruanne kaevamiste kohta kiviaja asulal Rõuge khk. Kasaritsa vl. Võru-Tamula järve kaldal Eduard Tärna heinamaal 18. VIII–1.IX 1942. a. (Manuscript in TLU AI)

Indreko, R. 1943. Kaevamisaruanne Rõuge khk. Kasaritsa vl. Tamula järve kaldal Ed. Tärna heinamaal 5–18.VIII 1943.a. (Manuscript in TLU AI)

Isaksson, S. & Hallgren, F. 2012. Lipid residue analyses of Early Neolithic funnel-beaker pottery from Skogsmossen, eastern Central Sweden, and the earliest evidence of dairying in Sweden. *Journal of Archaeological Science* 39: 3600-3609.

Jacobs K. 1995. Returning to Oleni' ostrov: Social, Economic, and Skeletal Dimensions of a Boreal Forest Mesolithic Cemetery. *J Anthropol Archaeol* 14: 359–403.

Jaanits, L. 1948. Aruanne kaevamistest Kursi khk-s ja vallas Kunila külas Mäe-Jaaniantsu e. Keldri talu piirides asulal Jaaniantsu mäel 5.-10. juunini 1948. (Manuscript in the Institute of History of Tallinn University.)

Jaanits, L. 1954. Aruanne arheoloogilistest proovikaevamistest muistsel asulakohal Narva linnas Joaorus 8.–25. juunini 1954. a. (Manuscript in TLU AI, 1-95-37)

Jaanits, L. 1955. Neoliitilised asulad Eesti NSV territooriumil. H. Moora & L. Jaanits (eds), *Muistsed asulad ja linnused. Arheoloogiline kogumik*. Tallinn: Eesti Riiklik Kirjastus, 176–201.

Jaanits, L. 1959c. Неолитическое поселение Валма. Труды Прибалтийской объединенной комплексной экспедиций I. Москва, 32–75.

Jaanits, L. 1965a. Aruanne arheoloogilistest kaevamistest Kivisaare kalmistul Viljandi rajoonis end. Kolga-Jaani kihelkonnas 29.VI 1962. a. ja 6.–19. VII 1965. (Manuscript in TLU AI)

Jaanits, L. 1965b. Über die Ergebnisse der Steinzeitforschung in Sowjetland. *Finskt Museum*, LXXII, 5–46.

Jaanits, L. 1979. Die Neolithische Siedlung Kõnnu auf der Insel Saaremaa. *Eesti NSV Teaduste Akadeemia Toimetised*, 28, (4). Tallinn, 363–367.

Jaanits, L. & Liiva, A. 1973. Eesti vanima ajaloo kronoloogia ja radiosüsinukumeetod. N. Alumäe (ed), *Eesti NSV Teaduste Akadeemia aastail 1965–1972*. Tallinn: Akadeemia, 157–161.

Jaanits, L., Laul, S., Lõugas, V. & Tõnisson, E. 1982. *Eesti esiajalugu*. Tallinn, Eesti Raamat.

Jennbert, K. 2011. Ertebølle pottery in southern Sweden – a question of handcraft, networks and creolisation in a period of neolithisation. In: Hartz, S., Lüth, F. & Terberger, T. (ed.). *Early Pottery in the Baltic – Dating, Origin and Social Context*. Bericht der Römisch-Germanische Kommission 89. Frankfurt: 89-110.

Kankaanpää, J. & T. Rankama. 2011. Spatial Patterns of the Early Mesolithic Sujala Site, Jaksland, L. & P. Persson. 2014. *E18 Brunlanesprosjektet, Bind I, Forutsetninger og kulturhistorisk sammenstilling*. Varia 79, Museum of Cultural History, University of Oslo.

Kazakevičius, V. 1993. *Plinkaigalio kapinynas. Monografija*. Lietuvos archeologija 10. Vilnius, Vilniaus mokslo ir enciklopedijų leidykla.

Kindgren, H., 2002. Tosskärr, Stenkyrka 94 revisited. In: B.V. Eriksen, and B. Bratlund (eds.). *Recent studies in the final Palaeolithic of the European plain*. Jutland Archaeological Society, Højbjerg, Denmark: 49-60.

Knarrström, B., 2004. The introduction of culture. 12000–7500 BC. In: M. Andersson, P. Karsten, B. Knarrström and M. Svensson, eds. *Stone age Scania: significant places dug and read by contract archaeology*. Riksantikvarieämbetet, Stockholm: 21-70.

Knutsson, H. & Knutsson, K. 2012. The postglacial colonization of humans, fauna and plants in northern Sweden. *Arkeologi i Norr* 13, 1-28.

Knutsson, K. 1988. *Making and using stone tools. The analysis of the lithic assemblages from Middle Neolithic sites with flint in Västerbotten, northern Sweden*. Uppsala University, Uppsala.

Koch, E. 1998. *Neolithic bog pots from Zealand, Møn, Lolland and Falster*. Det Kongelige Nordiske Oldskriftselskab, København.

Kriiska, A. 1997. Aruane arheoloogilisest inspeksioonist Ihastes (Tartu-Maarja khk.) 22.–27. sept. 1997. Tartu. (Manuscript in TÜ AK)

Kriiska, A. 2002. Lääna-Eesti saarte asustamina ja üsielanikkonna kujunemine. In: V. Lang, A. Kriiska (eds.), *Keskus- tagamaa – äärela: Uurimusi asustushierarhia ja võimukeskuste kujunemisest Eestis. Muinasaja Teadus 11*. Tallin, Tartu.

Kriiska, A., Johanson, K., Saluäär, U. & Lõugas, L. 2003. The results of research of Estonian Stone Age in 2002. *Archaeological Fieldwork in Estonia 2002*, 25–41.

Kriiska, A., Allmäe, R., Lõhmus, M. & Johanson, K. 2004. Archaeological investigation at the settlement and burial site of Kivisaare. *Archaeological Fieldwork in Estonia 2003*, 29–44.

Kriiska, A. 2007. Saaremaa kiviaeg. K. Jänes-Kapp, E. Randma & M. Soosaar (eds), *Saaremaa. Ajalugu. Majandus. Kultuur*. 2. Tallinn: Koolibri, 9–36.

Kriiska, A. 2009. The beginning of farming in the Eastern Baltic. P.M. Dolukhanov, G.R. Sarson & A.M. Shukurov (eds), *East European Plain on the Eve of Agriculture*. BAR IS 1964. Oxford: Archaeopress, 159–179.

Kriiska, A. 2015. Foreign Materials and Artefacts in the 4th and 3rd Millennia BCE Estonian Comb Ware Complex. In: Espak, P., Läänemets, M., Sazonov, V. (Ed.). *When Gods Spoke. Researches and Reflections on Religious Phenomena and Artefacts. Studia in honorem Tarmo Kulmar*. (107–124). Tartu: Tartu University Press. (Studia Orientalia Tartuensia, Series Nova; VI).

Kriiska, A. & Lõugas, L. 1999. Late Mesolithic and Early Neolithic seasonal settlement at Kõpu, Hiiumaa Island, Estonia. In: U. Miller, T. Hackens, V. Lang, A. Raukas, S. Hicks (eds.). *Environmental and Cultural History of the Eastern Baltic Region*. Rixensart: UNESCO, 157–172.

Kriiska, A. & Tvauri, A. 2002. *Eesti muinasaeg*. Tallinn: Avita.

Kriiska, A. & Lõhmus, M. 2005. Archaeological fieldwork on Kivisaare Stone Age burial ground and settlement site. *Archaeological Fieldwork in Estonia 2004*, 31–43.

Kriiska, A., Lõugas, L., Lõhmus, M., Mannermaa, K. & Johanson, K. 2007. New AMS dates from Estonian Stone Age burials sites. *Estonian Journal of Archaeology*, 11(2), 83–121.

Kriiska, A., Hertell, E. & Manninen, M.A. 2011. Stone Age Flint Technology in South-Western Estonia: Results from the Pärnu Bay Area. In: T. Rankama (ed.) *Mesolithic Interfaces. Variability in Lithic Technologies in Eastern Fennoscandia*. Monographs of the Archaeological Society of Finland 1, 64–93.

Kristiansen, K. 1991. Prehistoric Migrations – the case of the Single Grave and Corded Ware Cultures. *Journal of Danish Archaeology* 8: 137–151.

Kunskas, R., Butrimas, A., Česnys, G., Balčiūnienė, I., Jankauskas, R. 1985. Duonkalnis: vėlyvojo neolito gyvenvietė, alka ir kapinynas. In R. Volkaitė – Kulikauskienė, R. Rimantienė & G. Česnys (eds.). *Akmens amžiaus gyvenvietės ir kapinynai*: 25 – 66. *Lietuvos Archeologija* 4. Vilnius: Mokslo.

Lang, V. 2007a. *The Bronze and Early Iron Ages in Estonia*. Estonian Archaeology 3. Tartu: Tartu University Press.

Lang, V. 2007b. *Baltimaade pronksi ja rauaaeg*. Tartu: Tartu University Press.

Lang, V. & Kriiska, A. 2007. The Final Neolithic and Early Bronze Age Contacts between Estonia and Scandinavia. In: Fransson, U., Svedin, M., Bergerbrant, S. & Androshchuk, F. (eds.). *Cultural interaction between east and west. Archaeology, artefacts and human contacts in northern Europe*. Stockholm: Stockholm University, 107–112.

Larsson, L. 1994. The Earliest Settlement in Southern Sweden. Late Paleolithic Settlement Remains at Finjasjön, in the North of Scania. *Current Swedish*

*Archaeology* 2: 159–178.

Larsson, L., R. Liljegren, O. Magnell and J. Ekström. 2002. Archeo-faunal aspects of bog finds from Hässleberga, southern Scania, Sweden. In: V. B. Eriksson and B. Bratlund (eds.). *Recent Studies in the Final Palaeolithic of the European Plain*. Jutland Archaeological Society Publications Vol. 39, Jutland Archaeological Society: 61-74.

Larsson, Å. M. & Graner, G. 2010. More than meets the eye. Pottery craft in transition at the end of the Middle Neolithic in Eastern Sweden. In: Å. M. Larsson & L. Pappmehl-Dufay (eds.). *Uniting Sea II. Stone Age Societies in the Baltic Sea Region*. OPIA 51. Department of Archaeology and Ancient History, Uppsala University: 213-247.

Larsson, Å. M. 2009a. *Making and Breaking Bodies and Pots. Material and Ritual Practices in South Sweden in the Third Millennium BC*. Uppsala universitet, Uppsala.

Larsson, Å. M. 2009b. Pots, Pits, and People. Hunter-Gatherer Pottery Traditions in Neolithic Sweden. In: Gheorghiu, D. (ed.) *Early Farmers, Late Foragers, and Ceramic Traditions: On the Beginning of Pottery in the Near East and Europe*. Cambridge Scholars Publishing, Cambridge: 239-270.

Lidén, K. 1995. *Prehistoric diet transitions: an archaeological perspective*. Stockholm University, Stockholm.

*Lietuvs Aidas*, 1930.09.13, no.208.

Lõhmus, M. 2005. Kammkeraamika kultuuride matused Eestis ning nende tõlgendusprobleemid. BA Thesis. Tartu-Narva. (Manuscript in Archaeology Department, University of Tartu)

Lõugas, L. 1996. Stone Age fishing strategies in Estonia – what did they depend on? *Archaeofauna*, 5, 101–109.

Lõugas, L., Lidén K, & Nelson, D.E. 1996. Resource utilisation along the Estonian coast during the Stone Age. T. Hackens, S. Hicks, V. Lang, U. Miller & L. Saarse (eds), *Coastal Estonia: Recent Advances in Environmental and Cultural History*. PACT 51. Strasbourg: Council of Europe, Rixensart: PACT Belgium, 399–420.

Lõugas, L., Kriiska, A. & Maldre, L. 2007. New dates for the Late Neolithic Corded Ware Culture burials and early husbandry in the East Baltic region. *Archaeofauna*, 16, 21–31.

Loze I. 1993 The Early Neolithic in Latvia. The Narva Culture. *Acta Archaeologica* 63, 1992, 119-140.

Malmer, M. P. 1962. *Jungneolitische Studien*. Lunds universitet, Lund.

Malmer, M. P. 2002. *The Neolithic of South Sweden. TRB, GRK, and STR*. Almqvist & Wiksell International, Stockholm.

Mannermaa, K. 2008. *The Archaeology of Wings. Birds and People in the Baltic Sea*



*Region during the Stone Age*. Helsinki: Helda.

Mannermaa, K., Zagorksa, I., Junger, H. & Zarina, G. 2007. New radiocarbon dates of human and bird bones from Zvejnieki Stone Age burial ground in northern Latvia. *Before Farming*, 1–11.

Mark, K. Personal Archive. *Antropoloogiliste kogude kataloog*. Archaeological Archive at Tallinn University (TLU AI, F18).

Meinander, C. F. 1957. Kolsvidja. *Finska Fornminnesföreningens tidskrift* 58 (1957): 185–213.

Merkevičius, A. 2012. Turlojiškė Archaeological Complex. In G. Zabiela, Z. Baubonis, E. Marcinkevičiūtė (eds.). *Archeological Investigations in Independent Lithuania 1990-2010*, 12 – 16. Vilnius.

Miettinen A., Sarmaja-Korjonen K., Sonninen E., Jungner H., Lempiäinen T., Ylikoski K., Mäkiäho J.-P. and Carpelan C. 2008. The Palaeoenvironment of the ‘Antrea Net Find’. In: Lavento M, ed., *Karelian Isthmus. Stone Age studies in 1998–2003*. Iskos, Helsinki, 16: 71–87.

Möller, P., O. Östlund, L. Barnekow, P. Sandgren, F. Palmbo & E. Willerslev. 2012. Living at the margin of the retreating Fennoscandian Ice Sheet: The early Mesolithic sites at Aareavaara, northernmost Sweden. *The Holocene* 23 (1): 104-116.

Moora, H. 1926. Aruanne kaevamistest Lügänuše khk. Sope kl. Metsvälja tl. maal 23. aug. 1926. a. (Manuscript in the Institute of History of Tallinn University.)

Moora, H. 1946. Kaevamisaruanne Rõuge khk. Kasaritsa vallas Tamula järve kaldal paikneval neoliitilisel asulal 10.-19. augustil 1946. (Manuscript in the Institute of History of Tallinn University.)

Nilsson, M-L & Nilsson, L. 2003. Ett källsprång i Saxtorp. In: Svensson, M. (ed.): *I det neolitiska rummet*. Riksantikvarieämbetet, Lund: 242-295.

Nordqvist, B. 2000. *Coastal adaptations in the Mesolithic. A study of coastal sites with organic remains from the Boreal and Atlantic periods in Western Sweden*. Göteborg University, Göteborg.

Nordqvist, K. and Kriiska, A. (2015). Towards Neolithisation. The Mesolithic-Neolithic transition in the central area of the eastern part of the Baltic Sea. In: Jacek Kabaciński, Sönke Hartz, Daan C. M. Raemaekers and Thomas Terberger (Ed.). *The Dąbki Site in Pomerania and the Neolithisation of the North European Lowlands (c. 5000–3000 calBCE)*. (537–556). Leidorf: Verlag Marie Leidorf GmbH . Rahden/Westf. (Archäologie und Geschichte im Ostseeraum; 8).

Oinonen, M., Vasks, A., Zarina, G., Lavento, M. 2013. Stones, Bones, and Hillfort: Radiocarbon Dating of Kivutkalns Bronze-Working Center. *RADIOCARBON* 55, 3 pp. 1252-1264

Oinonen M et al. 2017. Manuscript on <sup>14</sup>C datings, stable isotopic analyses and reservoir effects on the samples of Kivutkalns site, in preparation.

Olausson, D, Hughes, R. & Högberg, A. 2012. A New Look at Bjurselet. The Neolithic Flint Axe Caches from Västerbotten, Sweden using non-destructive energy dispersive x-ray fluorescence analysis for provenance determination. *Acta Archaeologica* 83: 83-103.

Olson, C. 2008. *Neolithic fisheries: Osteoarchaeology of fish remains in the Baltic Sea Region*. Stockholm University, Stockholm.

O'Shea J., Zvelebil M. 1984. Oleneostrovskii Mogilnik: Reconstructing Social and Economic Organisation of Prehistoric Hunter-Fishers in Northern Russia. *J Anthropol Archaeol* 1: 1–40.

Oshibkina S.V. 1999. Tanged Point Industries in the North-West of Russia. In: Kozłowski SK, Gurba J, Zaliznyak LL, editors. *Tanged Points Cultures in Europe*. Lublin.

Østmo, E. 2007. The Northern periphery of the TRB. Graves and Ritual Deposits in Norway. *Acta Archaeologica* 78:2: 111-142.

Ostrauskas, T. 2002. Kundos kultūros tyrinėjimų problematika. *Lietuvos archeologija* 23. Vilnius, 93–106.

Ots, M. 2006. Merevaiguleiud Baltimaade kivi- ja pronksiaja muististes. MA dissertation. (Manuscript in the Library of the University of Tartu.)

Ottow, B. 1911. Das neolithische Grabfeld von Kiwisaar an der Phale (Nordlivland). *Sitzungsberichte der Gelehrten Estnischen Gesellschaft, 1910*. Jurjew-Dorpat, 148–160.

Piezonka, H. 2015. *Jäger, Fischer, Töpfer: Wildbeutergruppen mit früher Keramik in Nordosteuropa im 6. und 5. Jahrtausend v. Chr.*, Vol. 30, Rudolf Habelt, Bonn.

Poska, A. & Saarse, L. 2002. Vegetation development and introduction of agriculture to Saaremaa Island, Estonia: the human response to shore displacement. *The Holocene*, 12(5), 555–568.

Price, T.D. and Jacobs K. 1990. Olenii Ostrov: First radiocarbon dates from a major Mesolithic cemetery in Karelia, USSR. *Antiquity*, 64, pp 849-853.

Price, T. D. 2000. The introduction of farming in Northern Europe. In: Price, T. D. (ed.). *Europe's First Farmers*. Cambridge University Press, Cambridge: 260-300.

Ramsey, C. B., Pettitt, P. B., Hedges, R. E. M., Hodgins, H. W. L., Owen, D. C. 2000. Radiocarbon dates from the Oxford AMS System. *Archaeometry datelist* 29. *Archaeometry* 42 (1), 243 – 254. Blackwell Publishing Ltd.

Rasmussen et al. 2015. Early Divergent Strains of *Yersinia pestis* in Eurasia 5,000 Years Ago. *Cell*, Volume 163, Issue 3, 571–582.

Regnell, M. & K-G. Sjögren. 2006a. Introduction and development of agriculture. In: Sjögren K-G. (ed.). *Ecology and Economy in Stone Age and Bronze Age Scania*. Riksantikvarieämbetet, Lund: 106-169.

- Regnell, M. & K-G. Sjögren. 2006b. Vegetational development. In: Sjögren K-G. (ed.). *Ecology and Economy in Stone Age and Bronze Age Scania*. Riksantikvarieämbetet, Lund: 40-79.
- Reitan, G. & Persson, P. 2014. *Seinmesolittiske, neolittiske og yngre lokaliteter i Vestfold og Telemark*. Vestfoldbaneprosjektet: Arkeologiske undersøkelser i forbindelse med ny jernbane mellom Larvik og Porsgrunn. Bind 2. Kulturhistorisk museum, Oslo.
- Rimantienė, R., 1994 Die Steinzeit in Litauen, *Bericht der Römisch-Germanischen Kommission* 75, 27-146.
- Rosentau, A. Muru, M., Kriiska, A., Subetto, D.A., Vassiljev, J., Hang, T., Gerasimov, D., Nordqvist, K., Ludikova, A., Lõugas, L., Raig, H., Kihno, K., Aunap, R. & Letyka, N. 2013. Stone Age settlement and Holocene shore displacement in the Narva-Luga Klint Bay area, eastern Gulf of Finland. *Boreas. An International Journal of Quaternary Research*, 912–931.
- Rowley-Conwy, P. 2004 'How the West was lost: a reconsideration of agricultural origins in Britain, Ireland and southern Scandinavia.', *Current Anthropology* 45(S4): 83-113.
- Rowley-Conwy, P. A. 2011. Westward Ho! The spread of agriculture from Central Europe to the Atlantic. *Current Anthropology* 52(S4): 431-451.
- Saadre, E. 1936. Aruanne Kose khk., Triigi vld., Ardu kl., Hansu-Mardi tl. maal leitud kiviaja luustiku kohta suvel 19. augustil 1936. (Manuscript in the Institute of History of Tallinn University.)
- Saarse, L., Vassiljev, J. & Rosentau, A. 2009a. Litorina Sea shore displacement of the island of Saaremaa, Estonia. *Polish Geological Institute Special Papers*, 25, 59–66.
- Saarse, L., Vassiljev, J. & Rosentau, A. 2009b. Ancylus Lake and Litorina Sea transition on the Island of Saaremaa, Estonia: pilot study. *Baltica*, 22(1), 51–62.
- Schierbeck, A. 1994. *Hedningahällan, en undersökning för att skydda och vårda*. Riksantikvarieämbetet, Stockholm.
- Schmitt, L., S. Larsson, J. Burdukiewicz, J. Ziker, K. Svedhage, J. Zamon & H. Steffen. 2009. Chronological insights, cultural change, and resource exploitation on the west coast of Sweden during the Late Palaeolithic/Early Mesolithic transition. *Oxford Journal of Archaeology* 28(1): 1-27.
- Segerberg, A. 1999. *Bälinge mossar. Kustbor i Uppland under yngre stenålder*. Uppsala universitet, Uppsala.
- Sjögren, K-G. 2003. "Mångfalldige uhrminnes grafvar..." *Megalitgravar och samhälle i Västsverige*. Göteborgs universitet, Göteborg.
- Sjögren, K-G. 2010. Megaliths, Landscapes and Identities: the case of Falbygden, Sweden. In: M. Furholt, F. Lüth & J. Müller (eds.): *Megaliths and Identities*. Rudolf

Habelt, Bonn: 155-166.

Sjögren, K-G. 2011. C-14 chronology of scandinavian megalithic tombs. In: García Sanjuán, L.; Scarre, C. & Wheatley, D. W. (eds.). *Exploring Time and Matter in Prehistoric Monuments: Absolute Chronology and Rare Rocks in European Megaliths*. Menga, Journal of Andalusian Prehistory, Monograph 1: 103-119.

Solheim, S. 2012. *Lokal praksis og fremmed opphav. Arbeidsdeling, sosiale relasjoner og differensiering i østnorsk tidligneolitikum*. Oslo Universitet, Oslo.

Sørensen, L. 2014. From hunter to farmer in Northern Europe. Migration and adaptation during the Neolithic and Bronze Age. *Acta Archaeologica* 85:1. Wiley, Oxford.

Sørensen, M., Rankama, T., Kankaanpää, J., Knutsson, K., Knutsson, H., Melvold, S., Eriksen, B. V. & Glørstad, H. 2013. The first eastern migrations of people and knowledge into Scandinavia: Evidence from studies of Mesolithic Technology. *Norwegian Archaeological Review* 46 (1): 1-38.

Stafford, M. 1999. *From forager to farmer in flint. A lithic analysis of the prehistoric transition to agriculture in Southern Scandinavia*. Aarhus University Press, Aarhus.

Stenbäck, N. 2003. *Människorna vid havet. Platser och keramik på Ålandsöarna perioden 3500-2000 f.Kr.* Stockholms universitet, Stockholm.

Storå, J. 2001. *Reading bones. Stone Age hunters and seals in the Baltic*. Stockholm University, Stockholm.

Taffinder, J. 1998. *The allure of the exotic. The social use of non-local raw materials during the Stone Age in Sweden*. Uppsala University, Uppsala.

Tallgren, A. M. 1922. Zur Archäologie Eestis I. Vom Anfang der Besiedlung bis etwa 500 n. Chr. *Acta et Commentationes Universitatis Tartuensis (Dorpatensis)*, B III(6). Dorpat.

Tebelškis, P., Jankauskas, R.. 2006. The Late Neolithic Grave at Gyvakarai in Lithuania in the Context of Current Archaeological and Anthropological Knowledge. In V. Žulkus, V. Kazakevičius & A. Girininkas (eds.). *Archaeologia Baltica* 6: 8 – 20. Vilnius: Petro ofsetas

Timofeev, V. I. 2000. On the problem of the Scandinavian Pitted Ware Origin and the definition of the eastern component in this process. In: Jaanits, L. & Lang, V. (eds.). *De temporibus antiquissimis ad honorem Lembit Jaanits. Muinasaja teadus 8. Teaduste Akadeemia Kirjastus*, Tallinn: 209-222.

Tõrv, M. 2016. *Persistent Practices. A Multidisciplinary Study of Hunter-Gatherer Mortuary Remains from c. 6500-2500 BC, Estonia*. DISSERTATIONES ARCHAEOLOGIAE UNIVERSITATIS TARTUENSIS, 5. Tartu, Tartu University Press.

Tõrv, M. & Meadows, J. 2015. Radiocarbon dates and stable isotope data from the Early Bronze Age burials in Riigiküla I and Kivisaare settlement sites, Estonia. *Radiocarbon*, 57(4), 645–656.

Welinder, S. 1998. Neolithicum – Bronsålder 3900-500 f.Kr. In Myrdal, J. (ed). *Det svenska jordbrukets historia. Jordbrukets första femtusen år. Natur och kultur*, Stockholm.

Wood R. 2006. Chronometric and paleodietary studies at the Mesolithic and Neolithic burial ground of Minino, NW Russia. Dissertation for the MSc in archaeological Science. Oxford University.

Vasks A.(2010); Latvia as part of a sphere of contacts in the Bronze Age. *Archaeologia Baltica* 13: pp. 153-160.

Zagorska, I. 2006. Radiocarbon chronology of the Zvejnieki burials. In: L. Larsson & I. Zagorska (eds.). *Back to the Origin. New reserch in the Mesolithic-Neolithic Zvejnieki cemetery and environment, northern Latvia*. Acta Archaeologica Lundensia. Series in 8°, No. 52. Stockholm: Almqvist & Wiskell International, 91–113.

Žilinskas, J. 1931. *Akmens period (mesolithicum-neolithicum) žmogus Žemaitijoje ir Suvalkijoje, jo kilmė ir jojo ainiai*, 9 – 29, Kaunas

## Supplementary Information Section 2

### Supplementary Methods: Screening of samples

#### *Sampling and DNA extraction*

Sampling was performed in the cleanroom facilities at the Institute for Archeological Sciences in Tübingen for the Eastern Baltic material, at the Australian Centre for Ancient DNA for the Popovo sample, at the cleanroom facilities of the Max Planck Institute for the Science of Human History, Jena, for the sample from Olsund and Uzhni/Yuzhny Oleni Ostrov, and in the ancient DNA laboratory of the Archaeological Research Laboratory, Stockholm for the remaining Swedish material. The human remains were treated with ultraviolet (UV) light from all sides for 10 min to reduce surface DNA contamination. Teeth were sawed transversally at the border of root and crown before sampling dentine powder from the inside of the crown with a sterile dentistry drill. Bone powder was taken from the inner parts of the bones with a sterile dentistry drill after removing the surface layer of bone.

Between 30 and 200 mg powder were used for each DNA extraction (Supplementary Data 1, column M1). The extraction was performed following a modified protocol<sup>1</sup> resulting in 100µl of DNA extract for each sample. Negative controls were taken along for each extraction setup.

#### *Library preparation and targeted enrichment of human mtDNA*

Double-stranded next-generation sequencing libraries were prepared from an aliquot of extract following a protocol established for ancient DNA<sup>2</sup>. Negative controls were taken along for each library preparation setup. Some DNA extracts showed evidence of inhibition of enzymatic reactions, possibly due to the presence of humic acids or chemicals (glue or hardener) used for bone treatment<sup>3</sup>. To overcome inhibition, library preparation was repeated for samples that had a low DNA yield after initial library preparation or that had abnormal extracts (e.g. dark colouring, floating particles etc.) using around ten-fold less extract to dilute potential inhibiting factors. Libraries were then barcoded with sample specific index sequence combinations for later sequencing<sup>4</sup>.

The sample Olsund was converted into three libraries using uracil–DNA–glycosylase (UDG)-half treatment<sup>5</sup>, and was not enriched for mtDNA. The mtDNA haplogroup and mtDNA contamination reported for this sample was determined from the nuclear capture data.

Libraries were enriched for human mitochondrial DNA<sup>6</sup> pooling at most five different sample libraries into one capture pool.

#### *Sequencing*

Libraries and mtDNA enriched library pools were quantified on an Agilent 2100 Bioanalyzer DNA 1000 chip and pooled at equimolar concentration. Libraries not enriched for human mtDNA were shotgun sequenced to determine the percentage of endogenous human DNA in every DNA library and assign the genetic sex of

individuals<sup>7</sup>. Libraries enriched for mtDNA were sequenced separately to allow for reconstruction of the mitochondrial genome of each individual and estimation of modern mitochondrial contamination. Library pools were sequenced according to the manufacturer's protocols on an Illumina HiSeq2500 at the department of Medical Genetics at the University of Tübingen for 2 x 101 + 8 + 8 cycles to a depth of ~1.5 million reads per sample.

### *Data processing*

After demultiplexing, resulting sequencing reads were processed using a computational pipeline developed for aDNA<sup>8</sup> that merges paired-end reads (default parameters) and mapping of reads against a user-specified reference genome. Between 326 and 10,039,616 shotgun sequenced reads (Supplementary Data 1, column N) went into mapping with BWA (v0.6.1)<sup>9</sup> against UCSC genome browser's human genome reference GRCh37/hg19. For mtDNA capture data between 375 and 7,454,704 reads (Supplementary Data 1, column Q) went into mapping against the human mtDNA reference rCRS<sup>10</sup> using the circular mapper implemented in the pipeline<sup>8</sup>. The low number of reads mapping for Spiginas3 and Motala313 indicated a failure of reagents during library preparation.

The proportion of endogenous human DNA in shotgun sequencing ranged from 0.00% to 59.6% (Supplementary Data 1, column O). Genetic sex could confidently be determined for 55 individuals<sup>11</sup> (Supplementary Data 1, column U).

The mtDNA reconstruction and contamination estimation was performed by an iterative likelihood-based approach, taking into account that the consensus mtDNA sequence should be reconstructed from molecules that originate from a single individual and that show characteristics of aDNA<sup>12</sup>. Complete mitochondrial genomes (covered at least 85%) could be reconstructed for 61 individuals and less than 5% mitochondrial contamination (Supplementary Data1, column S). For these, the percentage of deamination at the molecule ends exceeded 20%, a characteristic of authentic ancient DNA<sup>13</sup> (Supplementary Data1, column T).

The screening procedure of the sample from site Popovo, Russia was previously described in Haak et al. 2015 and Mathieson et al. 2015.

### **References**

1. Dabney, J. *et al.* Complete mitochondrial genome sequence of a Middle Pleistocene cave bear reconstructed from ultrashort DNA fragments. *Proc Natl Acad Sci U S A* **110**, 15758-15763, doi:10.1073/pnas.1314445110 (2013).
2. Meyer, M. & Kircher, M. Illumina sequencing library preparation for highly multiplexed target capture and sequencing. *Cold Spring Harb Protoc* **2010**, pdb prot5448, doi:10.1101/pdb.prot5448 (2010).
3. Kemp, B. M., Monroe, C., Judd, K. G., Reams, E. & Grier, C. Evaluation of methods that subdue the effects of polymerase chain reaction inhibitors in the

- study of ancient and degraded DNA. *Journal of Archaeological Science* **42**, 373-380, doi:10.1016/j.jas.2013.11.023 (2014).
4. Kircher, M., Sawyer, S. & Meyer, M. Double indexing overcomes inaccuracies in multiplex sequencing on the Illumina platform. *Nucleic Acids Res* **40**, e3, doi:10.1093/nar/gkr771 (2012).
  5. Rohland, N., Harney, E., Mallick, S., Nordenfelt, S. & Reich, D. Partial uracil - DNA - glycosylase treatment for screening of ancient DNA. *Philosophical Transactions of the Royal Society B-Biological Sciences* **370**, doi:Unsp 2013062410.1098/Rstb.2013.0624 (2015).
  6. Maricic, T., Whitten, M. & Paabo, S. Multiplexed DNA sequence capture of mitochondrial genomes using PCR products. *PLoS One* **5**, e14004, doi:10.1371/journal.pone.0014004 (2010).
  7. Mittnik, A., Wang, C.-C., Svoboda, J. & Krause, J. A Molecular Approach to the Sexing of the Triple Burial at the Upper Paleolithic Site of Dolní Věstonice. (2016).
  8. Peltzer, A. *et al.* EAGER: efficient ancient genome reconstruction. *Genome Biol* **17**, 60, doi:10.1186/s13059-016-0918-z (2016).
  9. Li, H. & Durbin, R. Fast and accurate short read alignment with Burrows-Wheeler transform. *Bioinformatics* **25**, 1754-1760, doi:10.1093/bioinformatics/btp324 (2009).
  10. Andrews, R. M. *et al.* Reanalysis and revision of the Cambridge reference sequence for human mitochondrial DNA. *Nat Genet* **23**, 147, doi:10.1038/13779 (1999).
  11. Mittnik, A., Wang, C. C., Svoboda, J. & Krause, J. A Molecular Approach to the Sexing of the Triple Burial at the Upper Paleolithic Site of Dolni Vestonice. *PLoS One* **11**, e0163019, doi:10.1371/journal.pone.0163019 (2016).
  12. Renaud, G., Slon, V., Duggan, A. T. & Kelso, J. Schmutzi: estimation of contamination and endogenous mitochondrial consensus calling for ancient DNA. *Genome Biol* **16**, 224, doi:10.1186/s13059-015-0776-0 (2015).
  13. Sawyer, S., Krause, J., Guschanski, K., Savolainen, V. & Paabo, S. Temporal patterns of nucleotide misincorporations and DNA fragmentation in ancient DNA. *PLoS One* **7**, e34131, doi:10.1371/journal.pone.0034131 (2012).



## Supplementary Information Section 3

### Y chromosomal haplogroup analysis

We were able to determine the Y chromosomal haplogroup by examining a set of diagnostic positions on chromosome Y using the ISOGG database (<http://isogg.org/>, accessed in 2016 March). In order to perform this analysis, we restricted our analysis to only include reads with a mapping quality higher than 30. Afterwards, we determined the haplogroups by identifying the most derived Y chromosomal SNP in our individual.

**Spiginas1** could be assigned as **I2a1a2a1a** based on L233:G→A (2x). This individual also has one upstream mutations for haplogroup I2a1a2a (L1286: G→A at 1x) and one mutation for I2a1 (PF4004: T→C at 1x) and I2a (L460: A→C at 1x).

**Kretuonas2** has a derived allele at I2a1b1:C→T, however only with coverage of 1x. Due to missing significance at that position we are not confident in this assignment. We were however able to find multiple upstream mutations assigning this individual to I2a1b (CTS176, CTS1293, CTS1802, CTS5375, CTS7218, and S2702). We are confident that the placement of this sample in Y chromosomal haplogroup **I2a1b** is correct.

**Gyvakarai1** could be assigned as **R1a1a1b** based on S441:G→A (6x) and S224:C→T (3x). This individual also has two upstream mutations for haplogroup R1a1a1 (M417 and Page7) and multiple mutations for R1a1a (M515, M198, L168, M512, and L449) and R1a1 (PF6234, M459, and M448). We are confident that the placement of this sample in Y chromosomal haplogroup R1a1a1b is correct.

**Kunila2** has a derived allele at R1a1a1b:C→T, however only with coverage of 1x. Due to missing significance at that position we are not confident in this assignment. We were able to find one upstream mutation assigning this individual to **R1a1a1** (Page7: C→T at 1x), two mutations assigning this individual to R1a1a (M198:C→T at 2x and M512:C→T at 1x) and one mutation to R1a1 (PF6234: C→T at 1x).

**Spiginas2** could be assigned as **R1a1a1b** based on S441:G→A (3x). This individual also has multiple upstream mutations for haplogroup R1a1a (M515, L168, M512, M514, L449), R1a1 (PF6234 and L120) and R1a (L63 and L146).

**Olsund** could be assigned as **R1a1a1b** based on S441:G→A (3x). This individual also has multiple upstream mutations for haplogroup R1a1a (M515, L168 and L449), R1a1 (M459) and R1a (L63 and PF6175).

**Turlojske3** could be assigned as R1a1a1b based on S441:G→A (1x). This individual also has one upstream mutation for haplogroup R1a1a (L168:A→G at 1x), R1a1 (PF6234:C→T at 2x) and R1a (L62 and L63).

**Kivutkalns19** could be assigned as **R1a1a1b** based on S441:G→A (4x) and S224:C→T (1x). This individual also has two upstream mutations for haplogroup R1a1a1 (M417 and Page7) and two mutations for R1a1a (M515 and L449) and R1a1 (PF6234 and M459). We are confident that the placement of this sample in Y chromosomal haplogroup R1a1a1b is correct.

**Kivutkalns25** could be assigned as **R1a1a1b** based on S441:G→A (3x). This individual also has one upstream mutation for haplogroup R1a1a1 (M417) and two mutations for R1a1a (M515 and L449) and R1a1 (M516 and M459). We are confident that the placement of this sample in Y chromosomal haplogroup R1a1a1b is correct.

**Kivutkalns194** has a derived allele at **R1a1a**-L168:A→G. We were able to find one upstream mutation assigning this individual to R1a (L62:A→G at 2x) and one mutation assigning this individual to R1 (P286: C→T at 2x).

**Kivutkalns209** has a derived allele at R1a1a1-Page7:C→T, however only with coverage of 1x. Therefore we are not convinced that this represents the truth assigning this individual to R1a1a1, due to missing significance at that position. We were however able to find two upstream mutation assigning this individual to R1a1a (M515: T→A at 1x, L168:A→G at 4x) and multiple mutations assigning this individual to R1a1 (PF6234, L120 and M459). We are confident that the placement of this sample in Y chromosomal haplogroup **R1a1a** is correct.

**Kivutkalns222** has a derived allele at R1a1a1-M417:G→A, however only with coverage of 1x. Therefore we are not convinced that this represents the truth assigning this individual to R1a1a1, due to missing significance at that position. We were able to find one upstream mutation assigning this individual to R1a1a (M512: C→T at 1x), one mutation assigning this individual to R1a1 (M459:A→G at 1x) and one mutation to R1a (L62: A→G at 4x) and are confident with an assignment to **R1a1**.

Due to low coverage no assignment could be made for Popovo2.
